# Supplementary material for: Microstructure-based modelling of snow mechanics: experimental evaluation of the cone penetration test
Source: Copernicus journal article supplement (doi:10.5194/tc-18-3787-2024), 2024-08-23
Supplement: Supplementary file 1 [file tc-18-3787-2024-supplement.pdf]

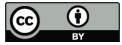

*Supplement of*

## **Microstructure-based modelling of snow mechanics: experimental evaluation of the cone penetration test**

**Clémence Herny et al.**

*Correspondence to:* Clémence Herny (clemence.herny@gmail.com)

The copyright of individual parts of the supplement might differ from the article licence.

## 1 S1 Numerical sensitivity analysis

2 Before performing DEM simulations on complete numerical samples, a series of numerical sensitivity analyses have been  
3 conducted to understand the dependencies of the model results on numerical parameters and choose optimised values. To limit  
4 the time allocated to this work, these sensitivity analyses have been performed on a reduced numerical sample, except for the  
5 analysis on numerical sample size. We chose a cubic numerical sample with a side length of 8 mm and a rod radius 6 times  
6 smaller than the actual one. The detailed results of these sensitivity analyses are presented in the following subsections.

### 7 S1.1 Sensitivity to grain shape representation

8 In the DEM simulations, a snow grain is modelled by a clump of spheres capturing its arbitrary shape. The downside of this  
9 approach is the potentially large number of spheres and interactions, resulting in time-consuming computation. To run DEM  
10 simulations on centimetre-sized numerical samples, involving thousands of grains, the grain shape representation had to be  
11 optimised to preserve a reliable mechanical behaviour along with a reasonable computing time. The two parameters used in  
12 the grain shape representation, (1) the minimum sphere radius  $L$  and (2) the minimum sphere coverage  $S$ , have been varied.  
13 Their influence on the sphere number (and thus on the computation time), the grain number, the interaction number, the  
14 volumetric representation and the mechanical response were investigated to establish the optimal choice of parameters.

15 This sensitivity analysis has been repeated for the four snow samples studied, i.e. RG, RGIr, DH and PP. Indeed, each snow  
16 type presents different grain characteristics and the optimised grain shape representation parameters may differ among them.  
17 The geometrical accuracy of the grain shape representation is evaluated through the volumetric error  $E_V$ . This quantity is  
18 computed as the ice volume difference between the original and the approximated image of the grains, divided by the ice  
19 volume of the original grain image (hence  $E_V = 0$  corresponds to perfectly reconstructed grains). The medial axis method used  
20 for the grain approximation implies an underestimation of the grain volume (Coeurjolly and Montanvert, 2017, Mede et al.,  
21 2018) and the smallest grains might not be represented. The global trend is that  $E_V$  decreases with the number of spheres  
22 increasing (Table S1 and Fig. S1). We also observe that  $E_V$  increases with  $L$  and  $S$ .

23 To evaluate the mechanical accuracy of the DEM simulations, a mechanical error  $E_M$  is computed similarly as in Mede et al.,  
24 2018. This quantity is defined as the normalised root mean square error of the force profile relative to a reference simulation  
25 (Table S1 and Fig. S1). The reference simulation is defined as the  $L - S$  combination values providing the lowest value of  $E_V$ .  
26 Note that  $E_M$  is computed on force profiles averaged over a rolling window  $\Delta z = 3$  mm to smooth out the fluctuations. The  
27 general trend observed is an increase of  $E_M$  with  $E_V$ . However, we notice that relatively low  $E_M$  and low  $E_V$  values can be  
28 reached for a moderate number of spheres (Table S1 and Fig. S1).

29

| Sample | L (vx) | S   | Number of spheres | Number of grains | Number of initial cohesive interactions between grains | $E_V$ (%) | $E_M$ (%) |
|--------|--------|-----|-------------------|------------------|--------------------------------------------------------|-----------|-----------|
| RG     | 2      | 0.2 | 695380            | 8362             | 14839                                                  | 10.5      | 0.0       |

|      |          |            |               |              |              |             |             |
|------|----------|------------|---------------|--------------|--------------|-------------|-------------|
|      | 2        | 0.3        | 478330        | 8362         | 14839        | 14.6        | 11.7        |
|      | 2        | 0.5        | 298981        | 8362         | 14839        | 22.6        | 34.6        |
|      | 2        | 0.8        | 199996        | 8362         | 14839        | 35.2        | 55.1        |
|      | 3        | 0.2        | 487094        | 8186         | 14642        | 14.2        | 21.6        |
|      | 3        | 0.3        | 340295        | 8186         | 14642        | 17.7        | 45.3        |
|      | 3        | 0.5        | 212439        | 8186         | 14642        | 24.9        | 62.4        |
|      | 5        | 0.2        | 153208        | 6156         | 10501        | 41.1        | 5.0         |
|      | <b>5</b> | <b>0.3</b> | <b>112139</b> | <b>6156</b>  | <b>10501</b> | <b>42.9</b> | <b>5.3</b>  |
| 5    | 0.5      | 74243      | 6156          | 10501        | 46.6         | 20.3        |             |
| RGlr | 3        | 0.2        | 148078        | 2065         | 5111         | 9.2         | 0.0         |
|      | 3        | 0.3        | 105859        | 2065         | 5111         | 13.1        | 21.9        |
|      | 3        | 0.5        | 69365         | 2065         | 5111         | 21.3        | 6.0         |
|      | 5        | 0.2        | 89053         | 1964         | 4963         | 11.1        | 4.8         |
|      | <b>5</b> | <b>0.3</b> | <b>61251</b>  | <b>1964</b>  | <b>4963</b>  | <b>14.9</b> | <b>4.2</b>  |
|      | 5        | 0.5        | 38256         | 1964         | 4963         | 22.5        | 24.3        |
| DH   | 8        | 0.2        | 47924         | 1695         | 4363         | 18.2        | 44.6        |
|      | 2        | 0.2        | 519856        | 3109         | 6144         | 8.0         | 0.0         |
|      | 2        | 0.3        | 360490        | 3109         | 6144         | 11.6        | 6.2         |
|      | 2        | 0.5        | 227247        | 3109         | 6144         | 19.5        | 32.3        |
|      | 2        | 0.8        | 154331        | 3109         | 6144         | 32.9        | 15.9        |
|      | 3        | 0.2        | 386882        | 3056         | 6085         | 10.2        | 5.9         |
|      | 3        | 0.3        | 271824        | 3056         | 6085         | 13.6        | 22.0        |
|      | 3        | 0.5        | 172874        | 3056         | 6085         | 20.8        | 32.2        |
|      | <b>5</b> | <b>0.2</b> | <b>162919</b> | <b>2527</b>  | <b>5147</b>  | <b>24.9</b> | <b>14.3</b> |
| 5    | 0.3      | 116547     | 2527          | 5147         | 27.4         | 25.8        |             |
| 5    | 0.5      | 76067      | 2527          | 5147         | 32.6         | 13.0        |             |
| PP   | 2        | 0.1        | 851438        | 19832        | 26217        | 17.4        | 0.0         |
|      | 2        | 0.2        | 590590        | 19832        | 26217        | 20.3        | 1.7         |
|      | 2        | 0.3        | 448132        | 19832        | 26217        | 24.4        | 2.9         |
|      | <b>2</b> | <b>0.5</b> | <b>306191</b> | <b>19832</b> | <b>26217</b> | <b>32.0</b> | <b>10.3</b> |
|      | 2        | 0.8        | 207615        | 19828        | 26212        | 44.0        | 24.4        |

Table S1 : Summary of the sensitivity analysis to the grain shape representation parameters: number of spheres, number of grains, number of cohesive interactions, volumetric error  $E_V$  and mechanical error  $E_M$  for each parameter combination. Note that  $E_M = 0$  for the chosen reference simulation. The selected numerical parameters of each snow sample and their respective characteristics are highlighted with bold text.

30  
31  
32  
33  
34

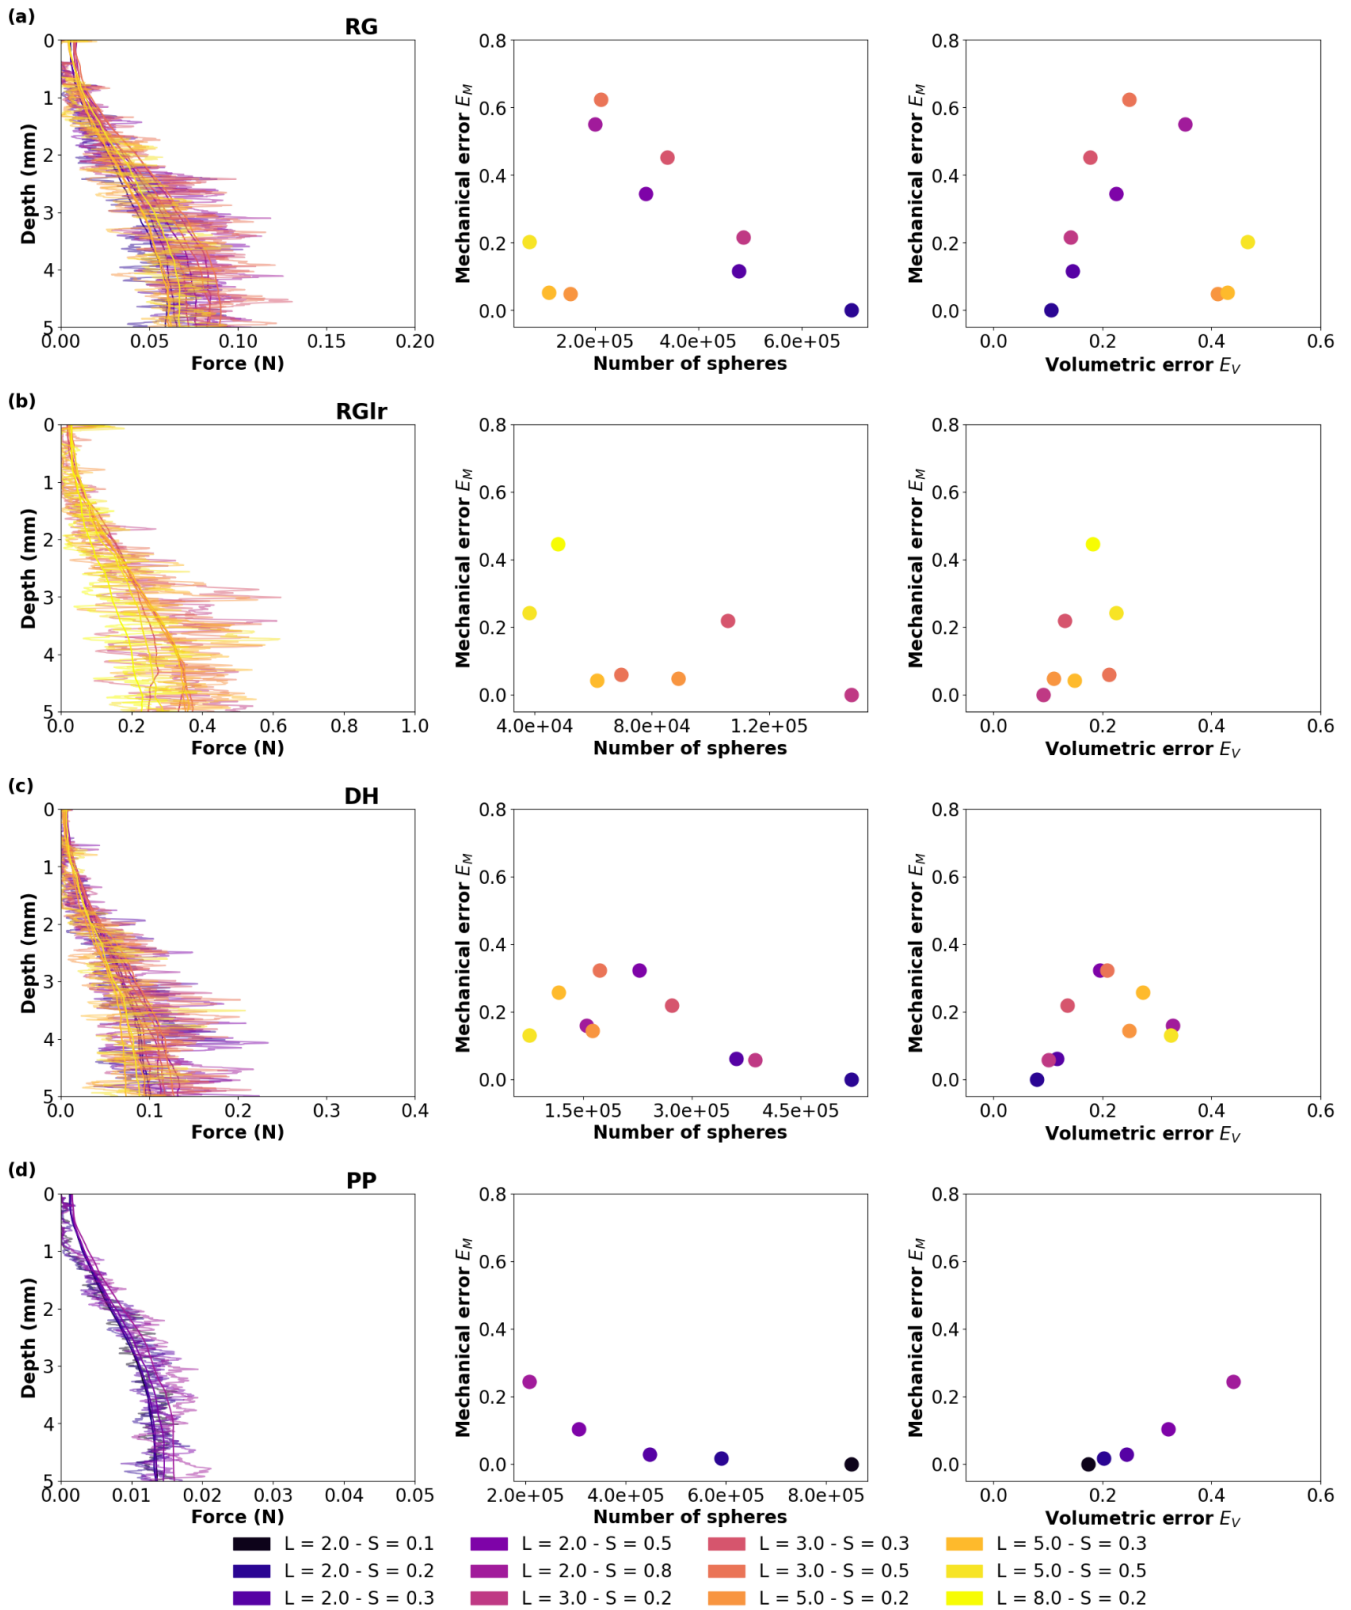

36 **Figure S1: Results of the sensitivity analysis to grain shape representation parameters  $L$  and  $S$  for the samples RG, RGl<sub>r</sub>, DH and**  
 37 **PP. (a) Full force profiles (light colour lines) and smoothed profiles (force averaged over a rolling window of 3 mm). (b) Evolution**  
 38 **of the volumetric error  $E_V$  with respect to the number of spheres for each  $L - S$  combination. (c) Evolution of volumetric error  $E_V$**   
 39 **vs mechanical error  $E_M$ . For each sample, the reference run to compute  $E_M$  corresponds to the numerical sample with the maximum**  
 40 **of spheres.**

41

42 In order to choose the shape parameters for each snow type, we selected the combination allowing to have  $E_M$  below a threshold  
 43 of 20% with the lowest number of spheres. For some samples (notably RG), this choice implies selecting a numerical sample  
 44 with a relatively high value of  $E_V$ .

### 45 S1.2 Sensitivity to numerical sample size

46 A larger numerical sample size implies larger numbers of grains, spheres and interactions, which directly affects the  
 47 computation time. The CPT configuration leaves scope for adapting the size of the numerical sample without introducing  
 48 border effects. To evaluate the influence of this parameter, we calculated the mechanical error  $E_M$  (Sect. S1.1) between the  
 49 force profiles obtained for different numerical sample sizes relative to a reference simulation computed with the largest possible  
 50 sample size along the x and y axis (14.1 mm side length). For all these simulations, the tip radius is set to 2.5 mm, consistent  
 51 with that of the SMP (Sect. 2.1.3) and the depth of the numerical sample is set at a constant value of 12 mm. This analysis was  
 52 performed only for the sample RGl<sub>r</sub>. Since this sample is characterised by the largest grain size (Table 1), it is the most likely  
 53 to be affected by border effects. We assume that the results can be applied to the other snow samples with smaller grain sizes.

54

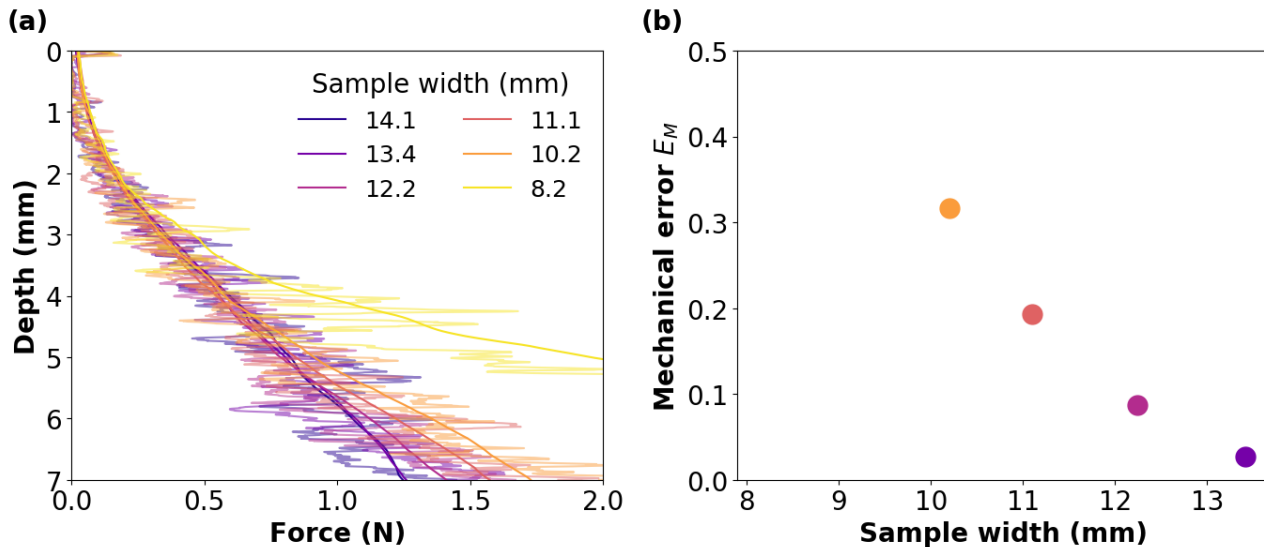

55

56 **Figure S2: Results of the sensitivity analysis on the numerical sample size. (a) Full force profiles (light colour lines) and smoothed**  
 57 **profiles (force averaged over a rolling window of 3 mm). (b) Mechanical error  $E_M$  as a function of the numerical sample width. The**  
 58 **reference force profile corresponds to a width of 14.1 mm. The data point corresponding to a sample width of 8.2 mm is out of the**  
 59 **range of the plot. The results were obtained for the RGl<sub>r</sub> sample.**

60

61 As shown in Fig. S2, it was observed that the numerical sample size can be reduced to 12 mm while still keeping a mechanical  
62 error  $E_M$  of less than 20% and a force profile well consistent with that of the reference case. Below this limit of 12 mm,  
63 typically, border effects become significant. Based on these results, our simulations were performed with a sample side length  
64 of 12.4 mm.

### 65 S1.3 Sensitivity to motion equation parameters

66

67 To reduce the computation time, the numerical time step can be increased by artificially increasing the mass of the grains  
68 through the definition of a mass factor  $f$  (Eq. (6), Sect. 2.2.3). The results of a dedicated sensitivity analysis show that mass  
69 factors up to  $1 \times 10^4$  provide consistent results with those obtained with  $f = 1$  (Fig. S3). All the simulation results presented in  
70 the paper were obtained with a mass factor  $f = 1 \times 10^2$ .

71

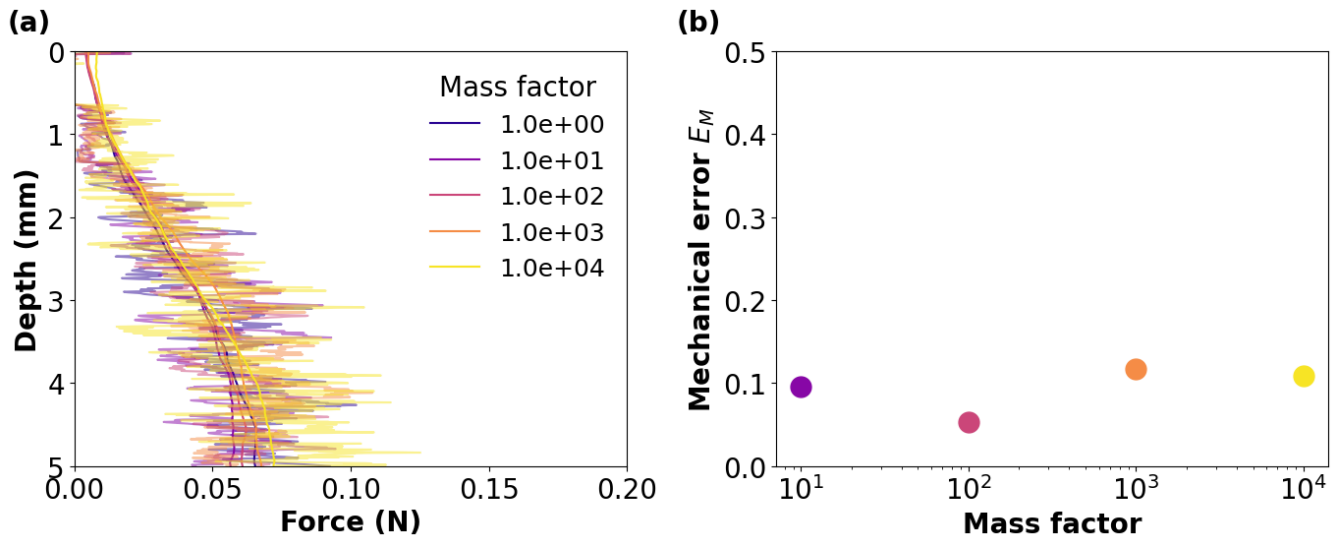

72

73 **Figure S3: Results of the sensitivity analysis to the mass factor. (a) Full force profiles (light colour lines) and smoothed profiles (force**  
74 **averaged over a rolling window of 3 mm). (b) Mechanical error  $E_M$  as a function of the mass factor. The reference profile corresponds**  
75 **to a mass factor of 1. The results were obtained for the RG sample.**

76

77 The Cundall's non-viscous damping coefficient  $\lambda$  is applied to prevent numerical oscillations. The sensitivity analysis of this  
78 parameter (Fig. S4) shows that it does not have a strong influence on the resulting force profiles. A value of 0.05 was chosen  
79 for our simulations.

80

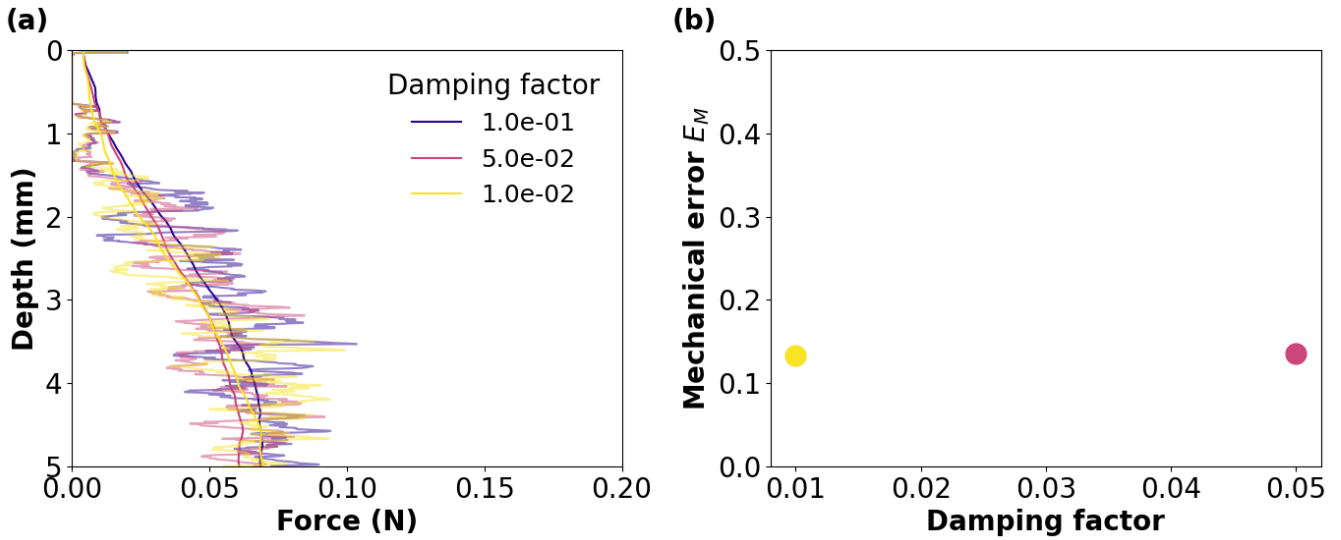

81  
 82 **Figure S4: Results of the sensitivity analysis to the Cundall's non-viscous damping coefficient. (a) Full force profiles (light-colour**  
 83 **lines) and smoothed profiles (force averaged over a rolling window of 3 mm). (b) Mechanical error  $E_M$  as a function of the damping**  
 84 **factor. The reference force profile corresponds to a damping factor of 0.1. The results were obtained for the RG sample.**

85

#### 86 **S1.4 Rigid grain assumption**

87 To be consistent with the DEM approach, the overlap between spheres in contact must remain under a few percent of the  
 88 sphere's radius (rigid grain assumption). Since Young's modulus, and thus contact stiffness (Sect. 2.2.2), was varied in our  
 89 study, we verified that the rigid grain assumption remained valid for all the values tested. Figure S5 shows that for Young's  
 90 modulus values in the range chosen for our study ( $E = 1 \times 10^8$ - $1 \times 10^{10}$  Pa), the relative sphere overlap effectively remains  
 91 negligible (under 1%). For lower values of Young's modulus ( $E \leq 1 \times 10^7$  Pa), relative overlap increases up to several  
 92 percent, which violates the rigid grain assumption.

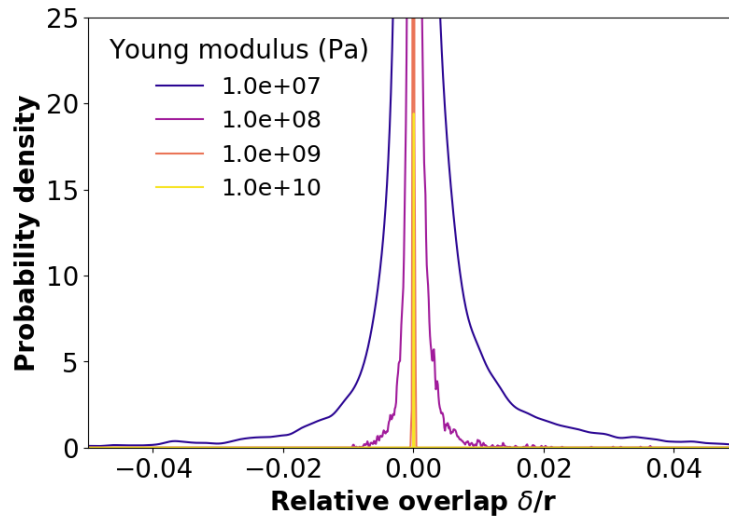

93  
94  
95

**Figure S5: Distribution of relative grain overlaps for a penetrating depth of 3 mm and for different values of Young's modulus  $E$  (Pa). The results were obtained for the RG sample.**

96

## **S2 Additional results**

97

### **S2.1 Simulated Cone Penetration Tests**

98

#### **S2.1.1 RGlR sample**

99

The macroscopic force profile displays an 'S' shape with a first transition at around 2.5 mm depth, and a second transition at around 8 mm depth (Fig. S6 (a)).

100

101



(a)

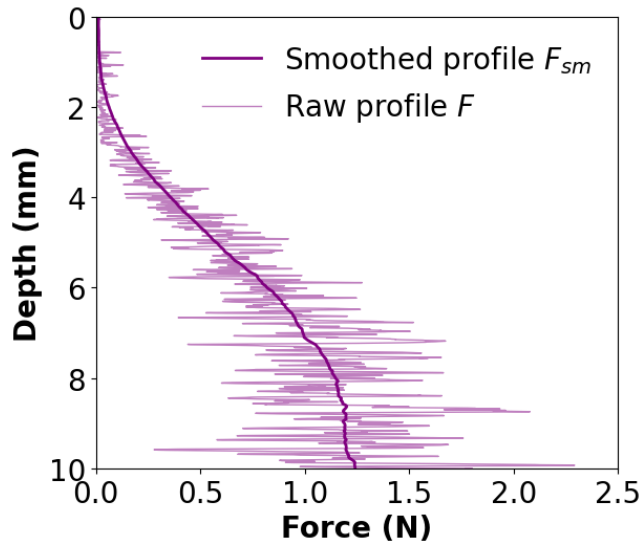

(b)

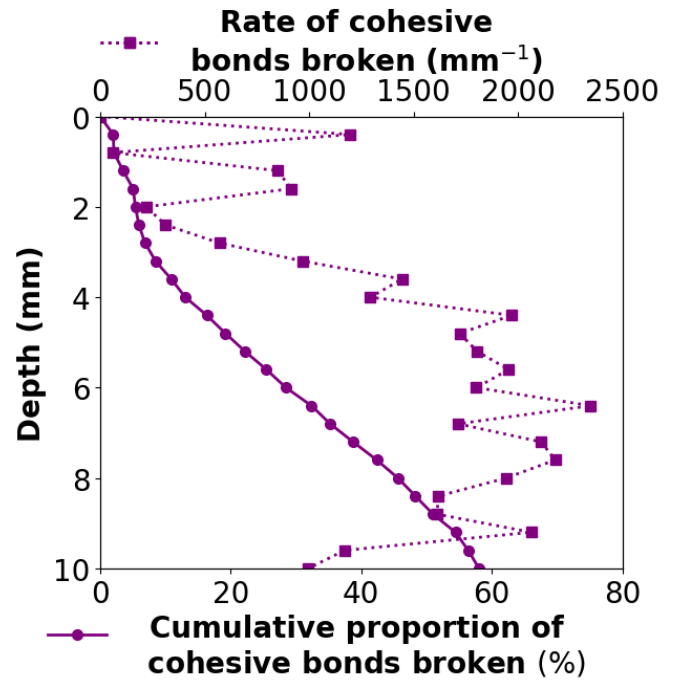

102  
103  
104  
105  
106

Figure S6: (a) Force  $F$  as a function of penetration depth (light line) obtained for the RGIr sample. The superposed smoothed profile (bold line)  $F_{sm}$  corresponds to the average force value over a rolling window of 3 mm. (b) Rate of cohesive bonds broken by mm and cumulative proportion of cohesive bonds broken (%) as a function of tip penetration depth. The initial number of cohesive bonds is indicated in Table 1. Results are obtained with the mechanical parameters indicated in Table 3.

107  
108  
109  
110

About 60% of the initial cohesive interactions broke over 10 mm of penetration, corresponding to an average rate of  $\sim 1400$  broken bonds  $\text{mm}^{-1}$  (Fig. S6 (b)).

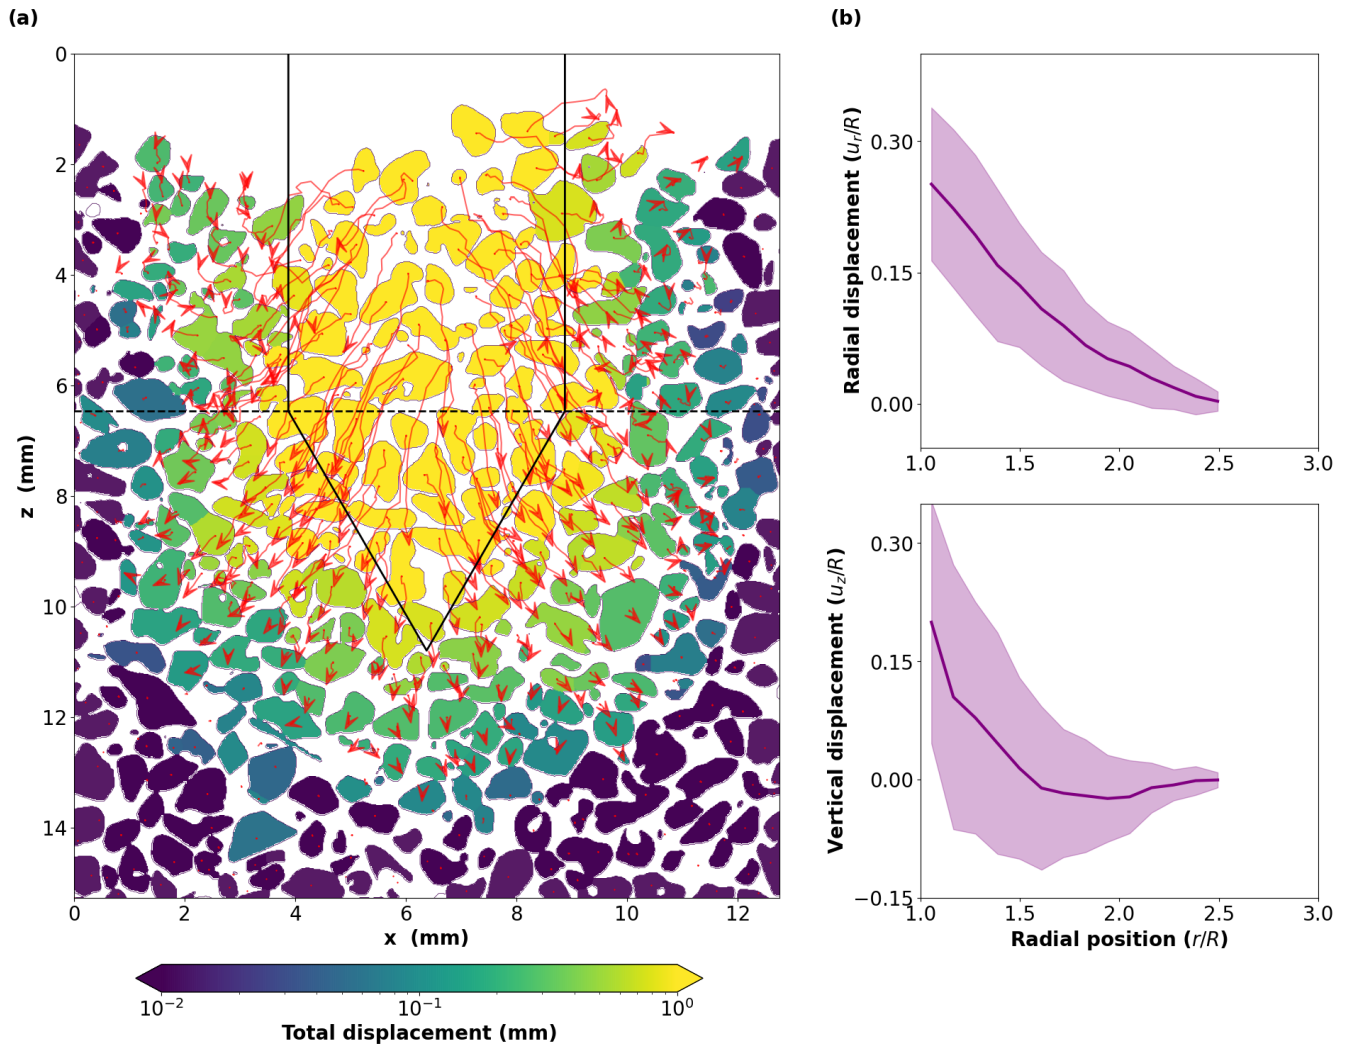

111 **Figure S7: (a) Simulated grain displacement map for the RGl sample. The red arrows indicate the grain trajectories while the**  
 112 **tip is penetrating (sampling = 0.4 mm). White grains correspond to grains that are not represented in the DEM simulation. The final**  
 113 **tip position is indicated by the black solid lines. The horizontal black dashed line indicates the cone top. (b) Radial (upper panel)**  
 114 **and vertical (lower panel) displacement profiles (red curves) for the RG sample. These profiles represent averages computed from**  
 115 **the sample surface to the cone top. By convention, downward (respectively upward) movement corresponds to positive (respectively**  
 116 **negative) values of vertical displacement. The shadowed areas around the solid lines represent the standard deviation of grain**  
 117 **displacements. The results are obtained with the mechanical parameters indicated in Table 3.**  
 118

119  
 120 For the RGl sample, the displacement field presents complex characteristics (Fig. S7 (a)). Close to the surface of the sample,  
 121 the grain trajectories are oriented upward. Predominantly downward displacements are then observed for larger depths, below  
 122 the cone top.

123 The observed curved trajectory, oriented upward in the area located between the sample surface and the cone top, is transcribed  
 124 in the average vertical displacement profile (Fig. S7 (b)) which essentially shows upward movement and reaches zero at a

125 radial position around  $2.4R$ . Recall that this average profile is computed from the sample surface to the cone top. The radial  
126 displacement profile follows a quasi-linear trend, reaching 0 at a radial position around  $2.5R$ .

### 127 S2.1.2 DH sample

128 The macroscopic force profile shows a first transition at around 2 mm depth (Fig. S8 (a)). At a depth of about 8 mm, the  
129 smoothed averaged force profile seems to stabilise at a nearly constant value, but this is less obvious than for the other samples.

130

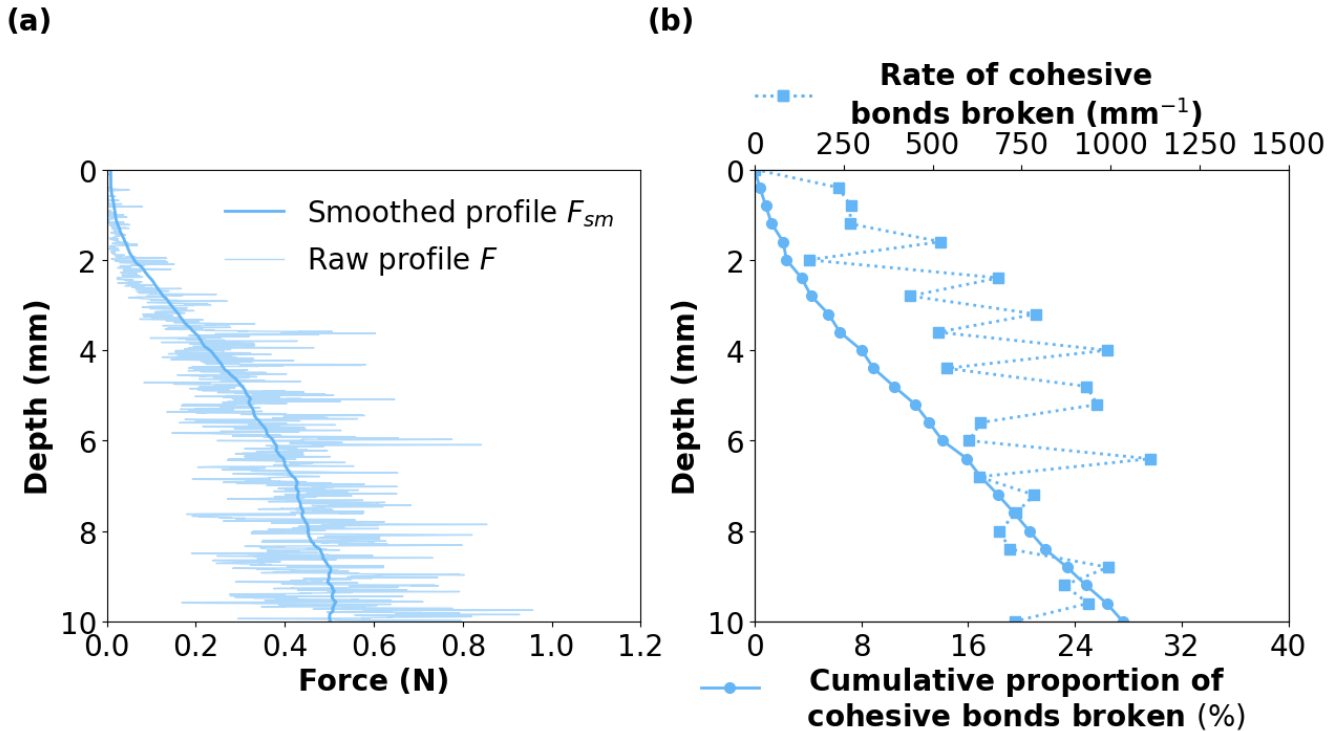

131 **Figure S8:** (a) Force  $F$  as a function of penetration depth (light line) obtained for the DH sample. The superposed smoothed profile  
132 (bold line)  $F_{sm}$  corresponds to the average force value over a rolling window of 3 mm. (b) Rate of cohesive bonds broken by mm and  
133 cumulative proportion of cohesive bonds broken (%) as a function of tip penetration depth. The initial number of cohesive bonds is  
134 indicated in Table 1. Results are obtained with the mechanical parameters indicated in Table 3.  
135

136

137 About 28% of the cohesive interactions broke over 10 mm of penetration, corresponding to an average rate of  $\sim 650$  bond  
138 failures  $\text{mm}^{-1}$  (Fig. S8 (b)). Unlike the other samples, no clear slope change is observed in the cumulative profile at a depth  
139 corresponding to the first transition in the force profile. The rate of bond failures shows a quasi-constant value over the entire  
140 depth of the profile.

141

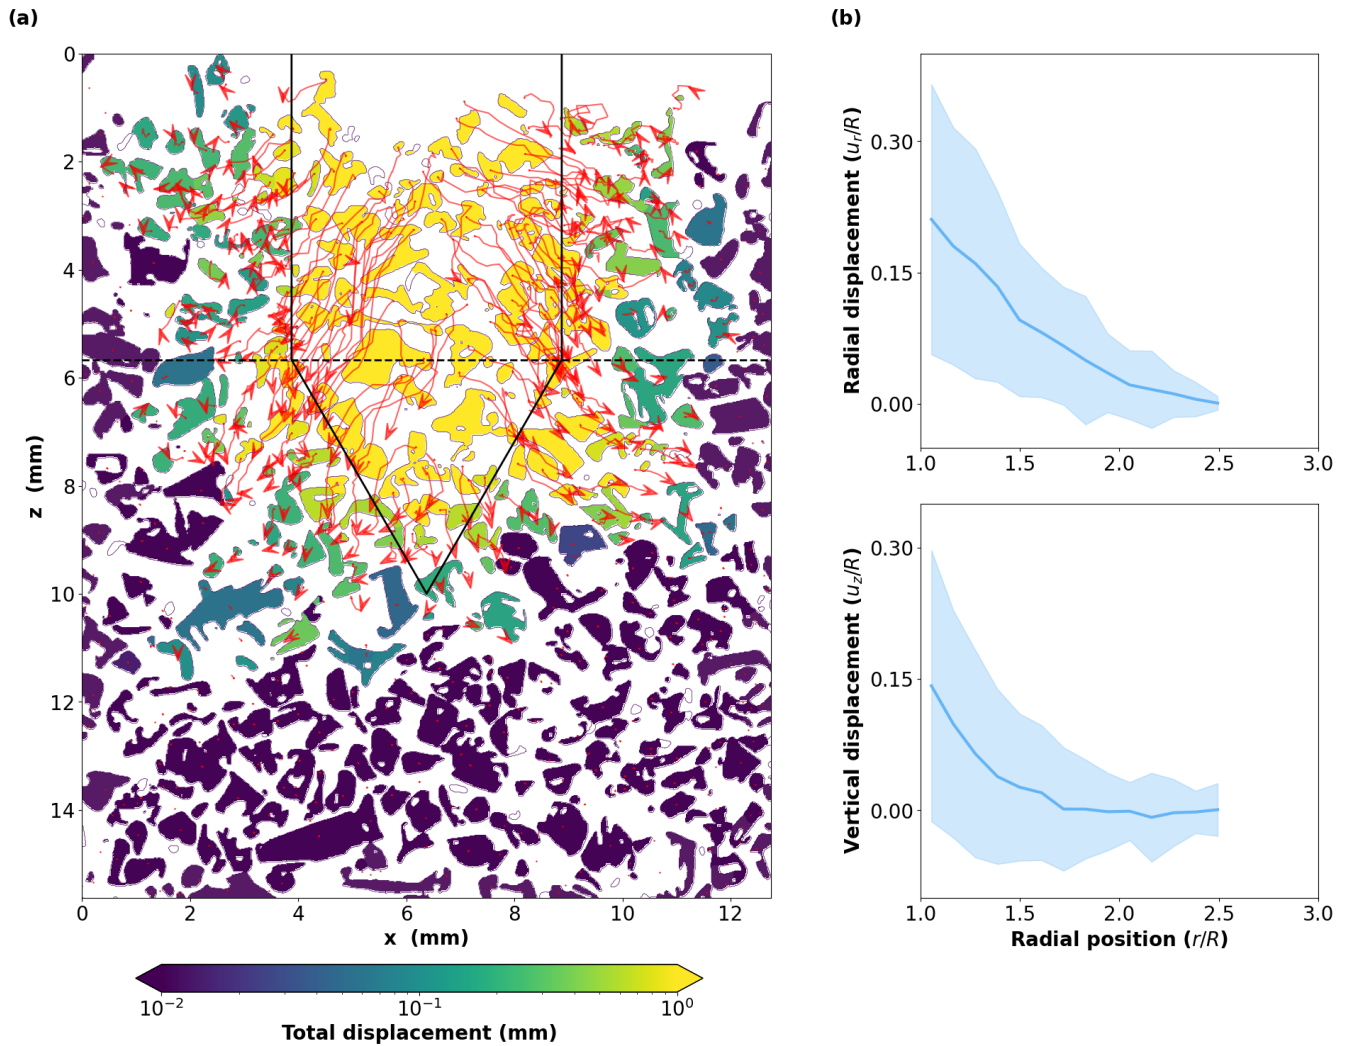

142  
 143 **Figure S9:** (a) Simulated grain displacement map for the DH sample. The red arrows indicate the grain trajectories while the tip is  
 144 penetrating (sampling = 0.4 mm). White grains correspond to grains that are not represented in the DEM simulation. The final tip  
 145 position is indicated by the black solid lines. The horizontal black dashed line indicates the cone top. (b) Radial (upper panel) and  
 146 vertical (lower panel) displacement profiles (red curves) for the RG sample. These profiles represent averages computed from the  
 147 sample surface to the cone top. By convention, downward (respectively upward) movement corresponds to positive (respectively  
 148 negative) values of vertical displacement. The shadowed areas around the solid lines represent the standard deviation of grain  
 149 displacements. The results are obtained with the mechanical parameters indicated in Table 3.

150

151 Grain trajectories for the DH sample show globally a similar pattern as that observed for the RG sample (F. S9 (a)). Both radial  
 152 and vertical displacement profiles display a pronounced decreasing trend, and reach zero at radial positions of about  $2.4R$  and  
 153  $2.0R$ , respectively (Fig. S9 (b)). The vertical profile indicates a dominant downward movement of the grains close to the tip.

154 **S2.1.3 PP sample**

155 The macroscopic force profile displays an ‘S’ shape with a first transition at around 2.0 mm depth, and a second transition at  
 156 around 6 mm depth (Fig. S10 (a)). Compared to the other samples, the second transition and the stabilisation of the force to a  
 157 quasi-constant level occurs at a shallower penetration depth.

158

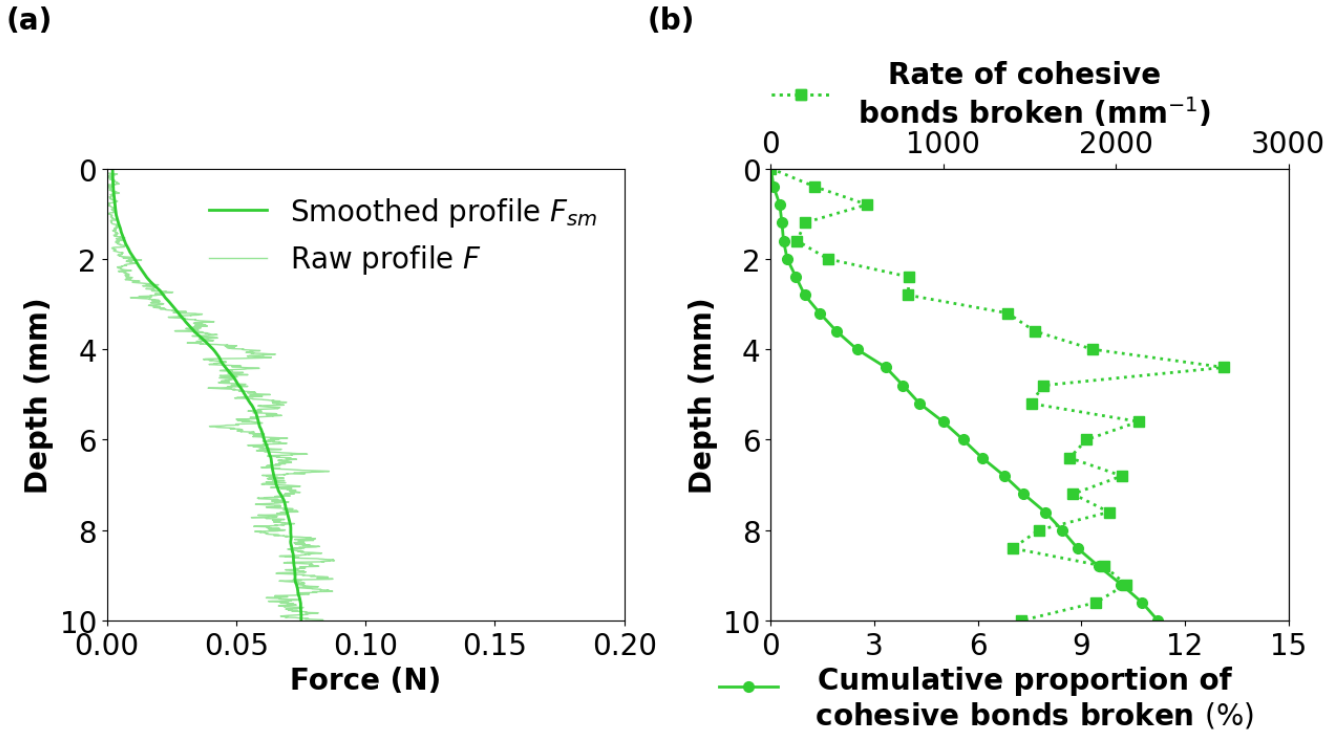

159 **Figure S10:** (a) Force  $F$  as a function of penetration depth (light line) obtained for the PP sample. The superposed smoothed profile  
 160 (bold line)  $F_{sm}$  corresponds to the average force value over a rolling window of 3 mm. (b) Rate of cohesive bonds broken by mm and  
 161 cumulative proportion of cohesive bonds broken (%) as a function of tip penetration depth. The initial number of cohesive bonds is  
 162 indicated in Table 1. Results are obtained with the mechanical parameters indicated in Table 3.  
 163

164 About 12% of the cohesive interactions broke over 10 mm of penetration, corresponding to an average rate of  $\sim 1360$  bond  
 165 failures  $\text{mm}^{-1}$  (Fig. S10 (b)).

166

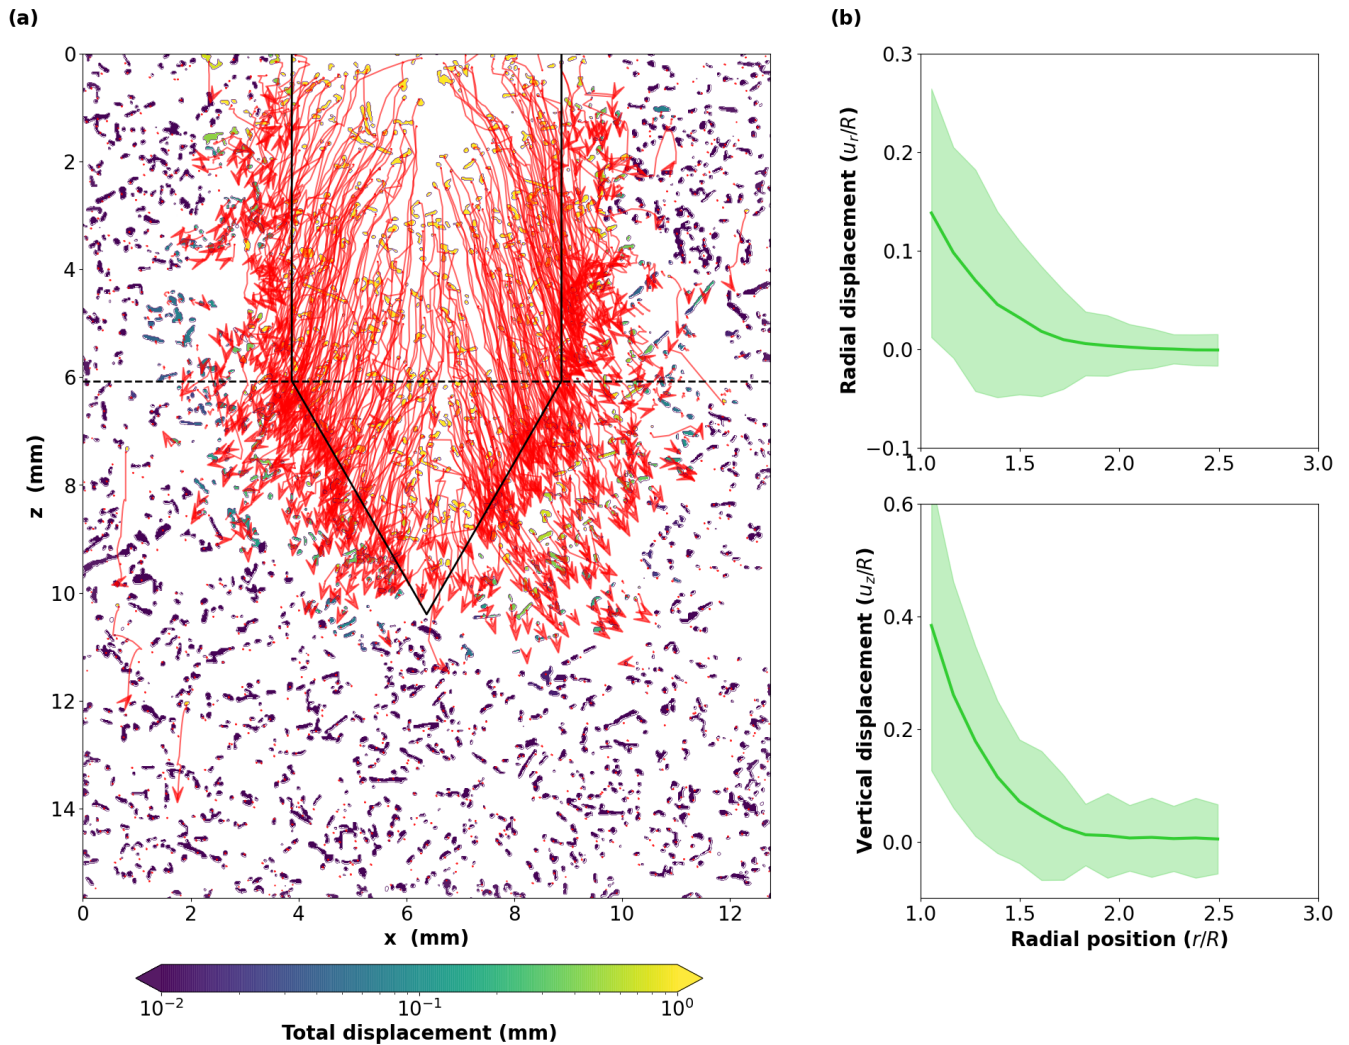

167  
 168 **Figure S11: (a) Simulated grain displacement map for the PP sample. The red arrows indicate the grain trajectories while the tip is**  
 169 **penetrating (sampling = 0.4 mm). White grains correspond to grains that are not represented in the DEM simulation. The final tip**  
 170 **position is indicated by the black solid lines. The horizontal black dashed line indicates the cone top. (b) Radial (upper panel) and**  
 171 **vertical (lower panel) displacement profiles (red curves) for the RG sample. These profiles represent averages computed from the**  
 172 **sample surface to the cone top. By convention, downward (respectively upward) movement corresponds to positive (respectively**  
 173 **negative) values of vertical displacement. The shadowed areas around the solid lines represent the standard deviation of grain**  
 174 **displacements. The results are obtained with the mechanical parameters indicated in Table 3.**

175

176 Figure S11a shows the total displacement of the grains and their respective trajectories for the PP sample. The largest  
 177 displacements (up to several mm) are observed for grains initially located on the trajectory of the tip, while around the tip the  
 178 displacements are < 1 mm and are mainly localised close to the tip. Grain trajectories indicate that grains are pushed downward  
 179 from each side of the tip. The grains initially located in the middle of the tip path display a quasi-straight vertical trajectory.  
 180 The trajectories become more radial away from the tip medial axis, with the grains being also pushed aside. The grain

181 trajectories are predominantly linear, with a rather vertical orientation at the cone top and a more radial orientation near the  
182 tip. Both radial and vertical displacement profiles display a pronounced decreasing trend, and reach zero at radial positions of  
183 about  $1.7R$  and  $2.0R$ , respectively (Fig. S11 (b)). The vertical profile attests to a dominant downward movement of the grains  
184 close to the tip.

## 185 S2.2 Mechanical parameters sensitivity analysis

186 In this section, the figures obtained for the mechanical parameters sensitivity analysis are presented respectively for each  
187 sample. The description and interpretation of the plots can be found in the core of the article (Sect. 3.2 and 3.3).

### 188 S2.2.1 RG sample

189

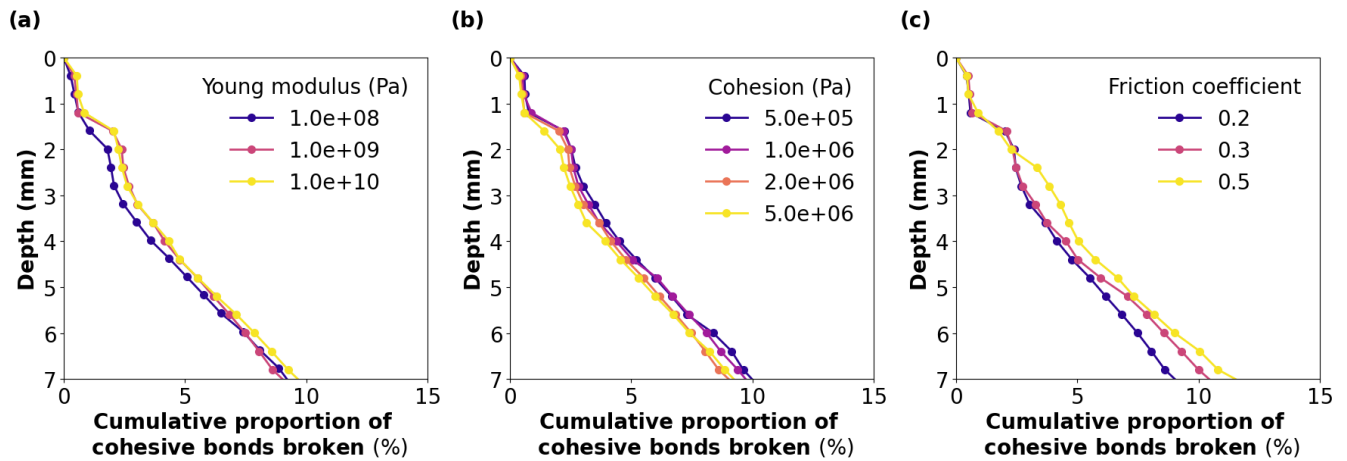

190

191 **Figure S12: Influence of mechanical parameters on the cumulative number of cohesive bonds as a function of tip penetration depth**  
192 **obtained with DEM numerical simulations of CPT. The sensitivity analysis has been performed on (a) Young's modulus  $E$  (Pa) ( $C$**   
193  **$= 2.0 \times 10^6$  Pa and  $\tan(\varphi) = 0.2$ ), (b) the Cohesion  $C$  (Pa) ( $E = 1.0 \times 10^9$  Pa and  $\tan(\varphi) = 0.2$ ) and (c) the Friction coefficient  $\tan(\varphi)$  ( $E$**   
194  **$= 1.0 \times 10^9$  Pa and  $C = 2.0 \times 10^6$  Pa).**

195

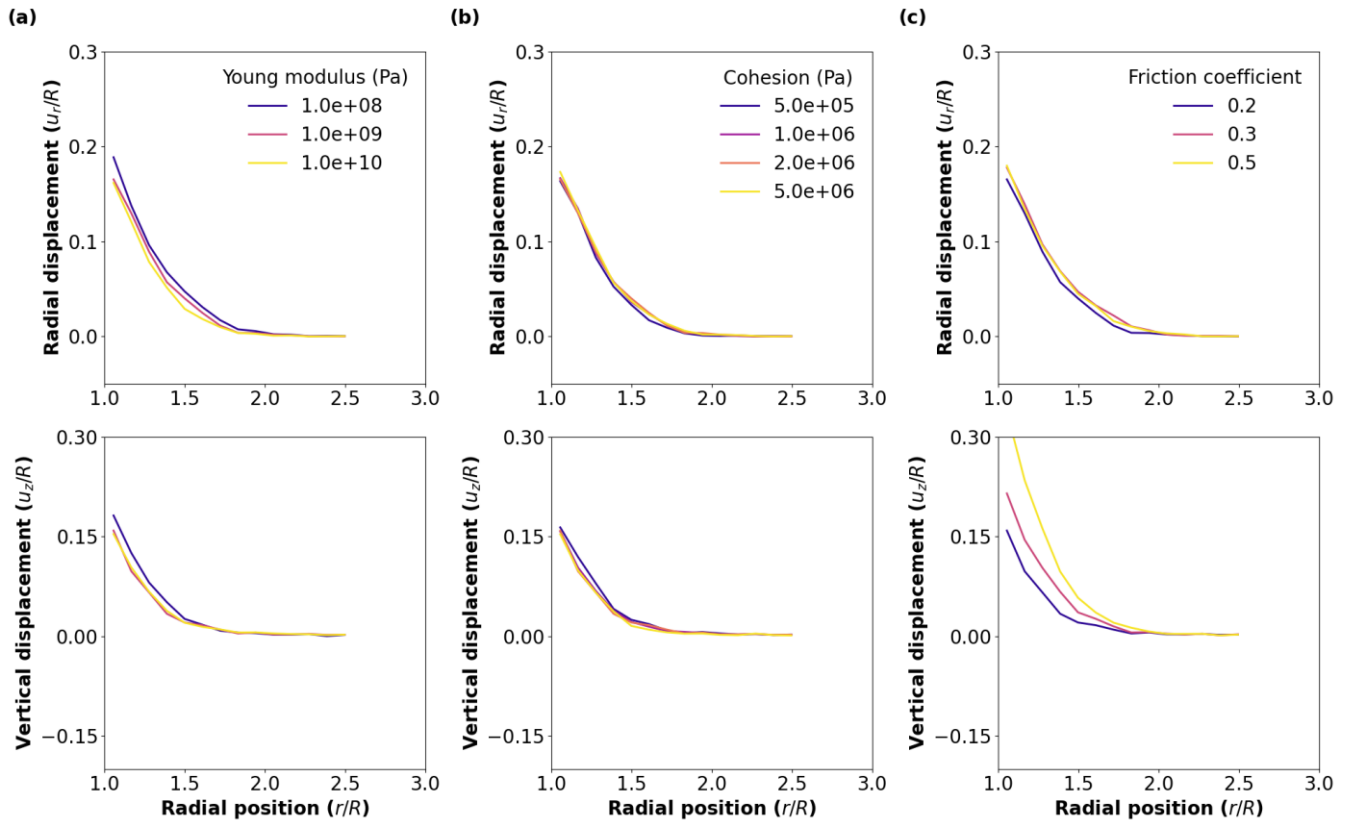

196

197 **Figure S13: Influence of mechanical parameters on the radial (top) and vertical (bottom) displacement profile obtained with DEM**  
 198 **numerical simulations of CPT. The sensitivity analysis has been performed on (a) Young's modulus  $E$  (Pa) ( $C = 2.0 \times 10^6$  Pa and**  
 199  **$\tan(\varphi) = 0.2$ ), (b) the Cohesion  $C$  (Pa) ( $E = 1.0 \times 10^9$  Pa and  $\tan(\varphi) = 0.2$ ) and (c) the Friction coefficient  $\tan(\varphi)$  ( $E = 1.0 \times 10^9$  Pa and**  
 200  **$C = 2.0 \times 10^6$  Pa).**

201

202 **S2.2.2 RGIr sample**

203



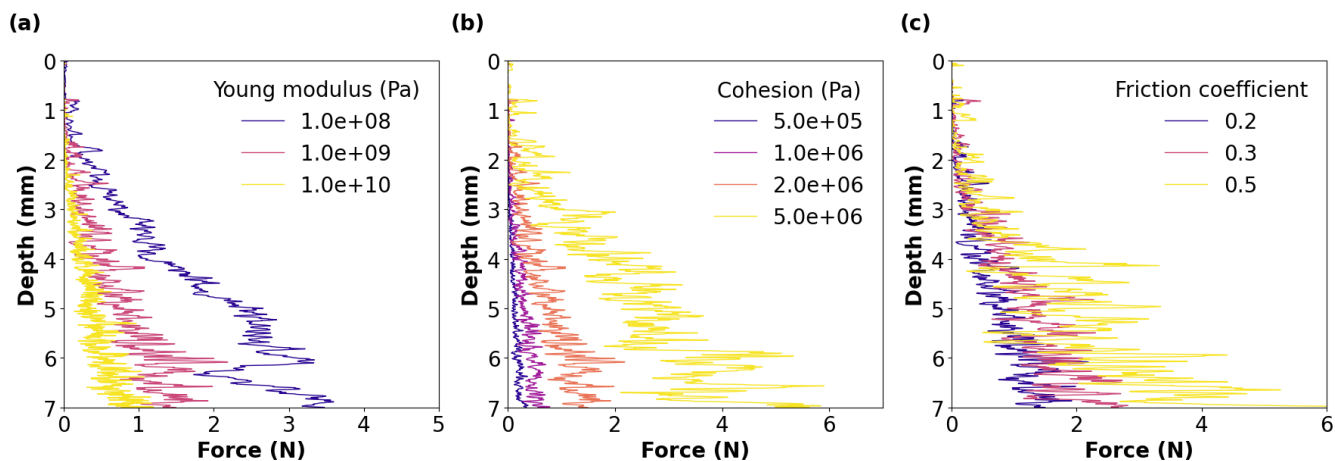

204  
 205 **Figure S14: Influence of mechanical parameters on the force profile obtained with DEM numerical simulations of CPT. The**  
 206 **sensitivity analysis has been performed on (a) Young's modulus  $E$  (Pa) ( $C = 2.0 \times 10^6$  Pa and  $\tan(\varphi) = 0.2$ ), (b) the Cohesion  $C$  (Pa)**  
 207 **( $E = 1.0 \times 10^9$  Pa and  $\tan(\varphi) = 0.2$ ) and (c) the Friction coefficient  $\tan(\varphi)$  ( $E = 1.0 \times 10^9$  Pa and  $C = 2.0 \times 10^6$  Pa).**

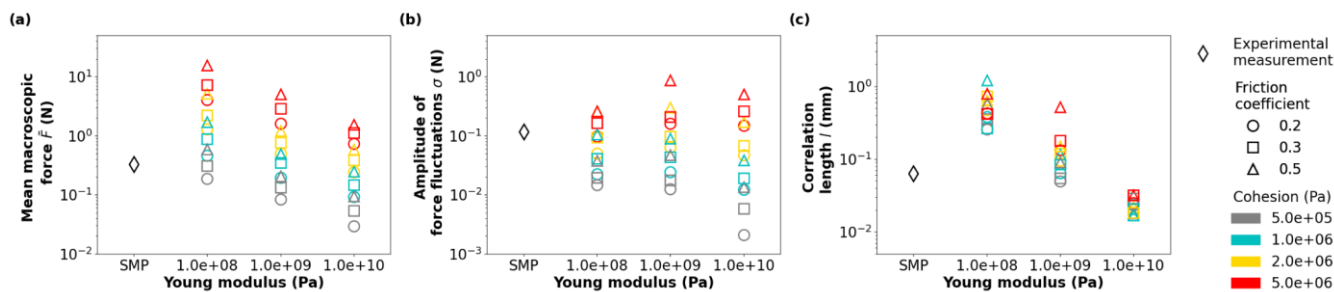

209  
 210 **Figure S15: Evolution of statistical indicators as a function of Young's modulus, cohesion and friction angle: (a) Mean macroscopic**  
 211 **force  $\bar{F}$ , (b) amplitude of force fluctuations  $\sigma$ , and (c) correlation length  $l$ . The experimental results (black diamonds) have been**  
 212 **added to the plots. The results presented here correspond to the RGIr sample.**

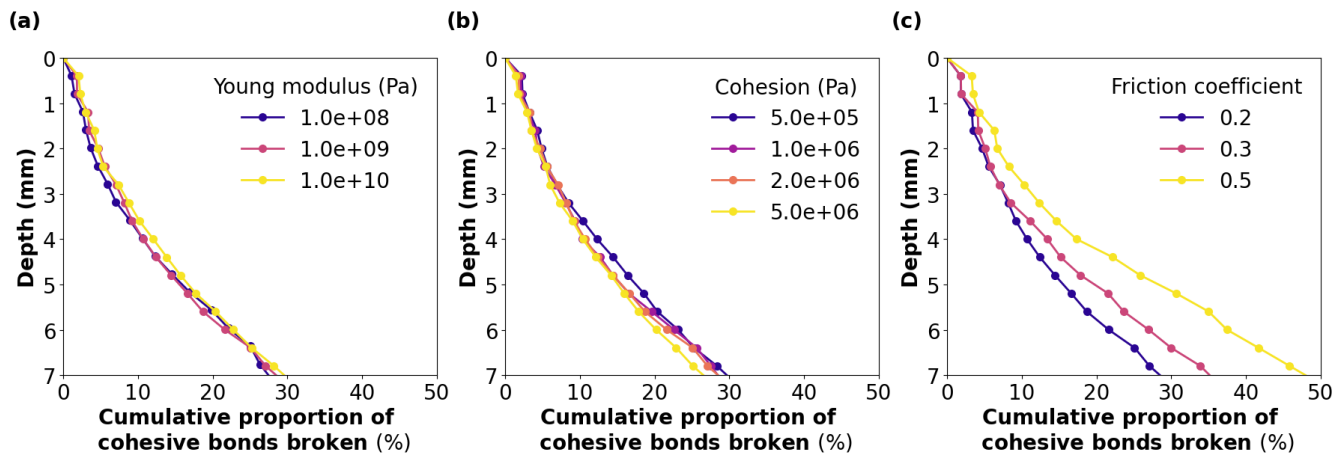

214  
 215 **Figure S16: Influence of mechanical parameters on the cumulative number of cohesive bonds as a function of tip penetration depth**  
 216 **obtained with DEM numerical simulations of CPT. The sensitivity analysis has been performed on (a) Young's modulus  $E$  (Pa) ( $C$**   
 217  **$= 2.0 \times 10^6$  Pa and  $\tan(\phi) = 0.2$ ), (b) the Cohesion  $C$  (Pa) ( $E = 1.0 \times 10^9$  Pa and  $\tan(\phi) = 0.2$ ) and (c) the Friction coefficient  $\tan(\phi)$  ( $E$**   
 218  **$= 1.0 \times 10^9$  Pa and  $C = 2.0 \times 10^6$  Pa).**

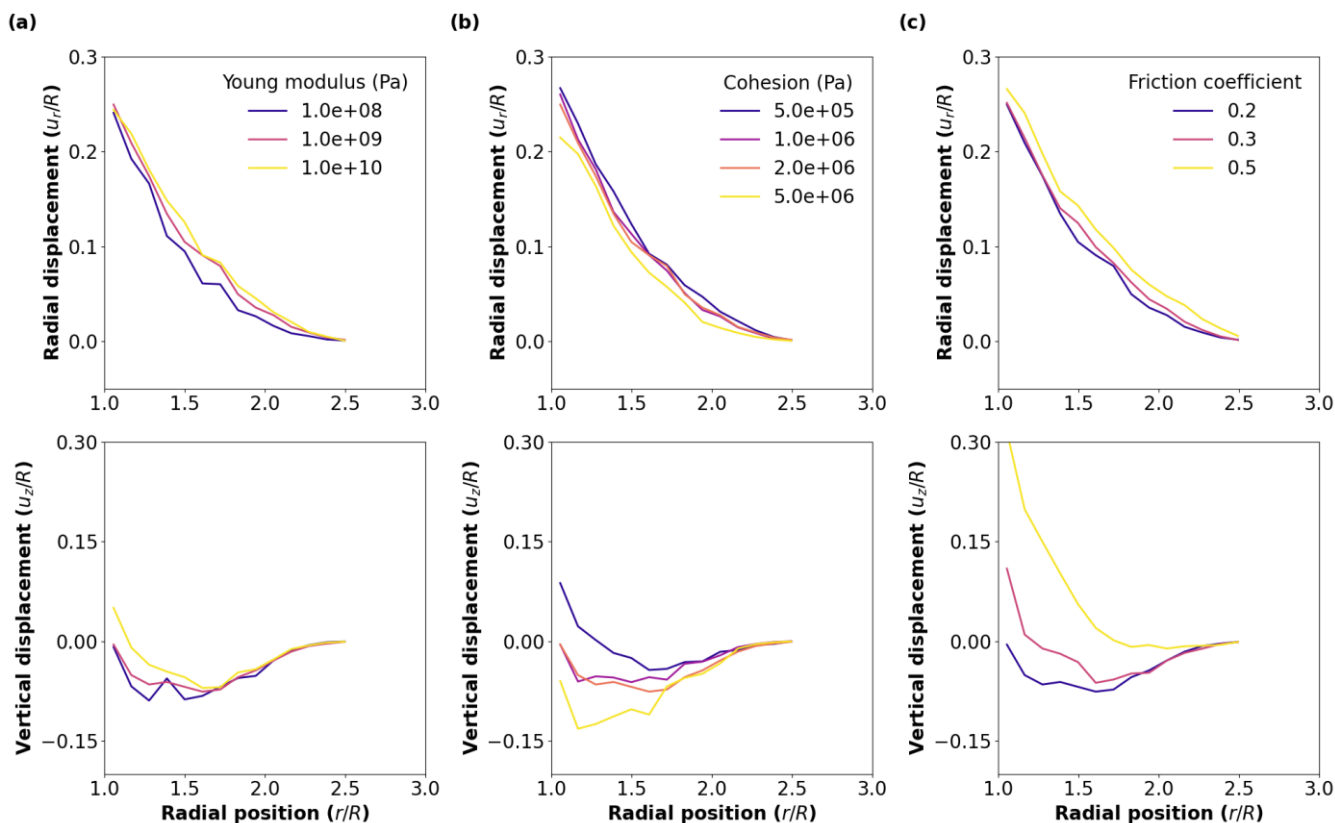

220  
 221 **Figure S17: Influence of mechanical parameters on the radial (top) and vertical (bottom) displacement profile obtained with DEM**  
 222 **numerical simulations of CPT. The sensitivity analysis has been performed on (a) Young's modulus  $E$  (Pa) ( $C = 2.0 \times 10^6$  Pa and**

223  $\tan(\varphi) = 0.2$ ), (b) the Cohesion  $C$  (Pa) ( $E = 1.0 \times 10^9$  Pa and  $\tan(\varphi) = 0.2$ ) and (c) the Friction coefficient  $\tan(\varphi)$  ( $E = 1.0 \times 10^9$  Pa and  
 224  $C = 2.0 \times 10^6$  Pa).

225

226 **S2.2.3 DH sample**

227

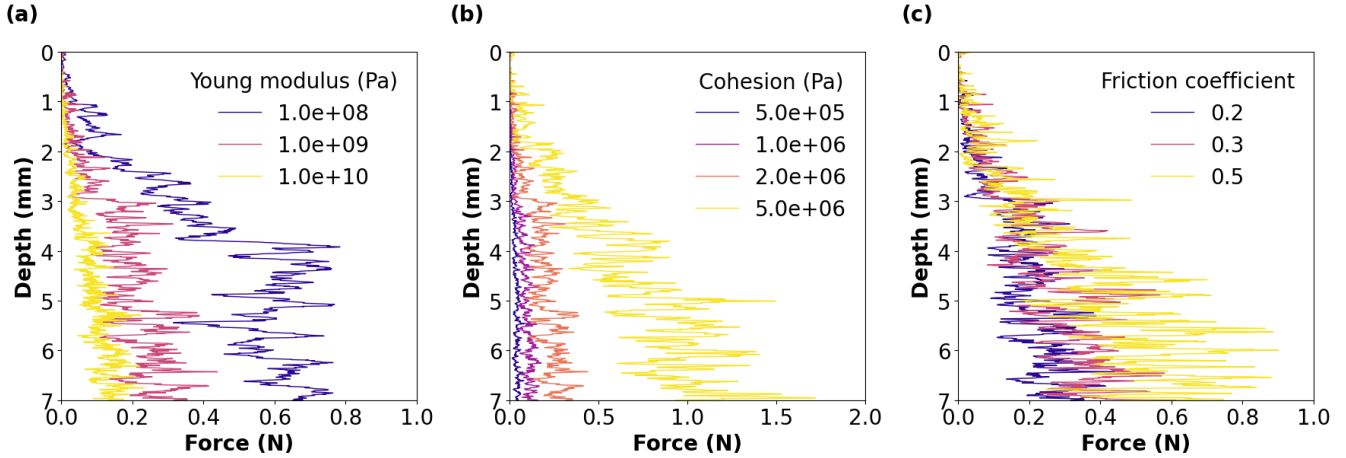

228

229 **Figure S18: Influence of mechanical parameters on the force profile obtained with DEM numerical simulations of CPT. The**  
 230 **sensitivity analysis has been performed on (a) Young's modulus  $E$  (Pa) ( $C = 2.0 \times 10^6$  Pa and  $\tan(\varphi) = 0.2$ ), (b) the Cohesion  $C$  (Pa)**  
 231 **( $E = 1.0 \times 10^9$  Pa and  $\tan(\varphi) = 0.2$ ) and (c) the Friction coefficient  $\tan(\varphi)$  ( $E = 1.0 \times 10^9$  Pa and  $C = 2.0 \times 10^6$  Pa).**

232

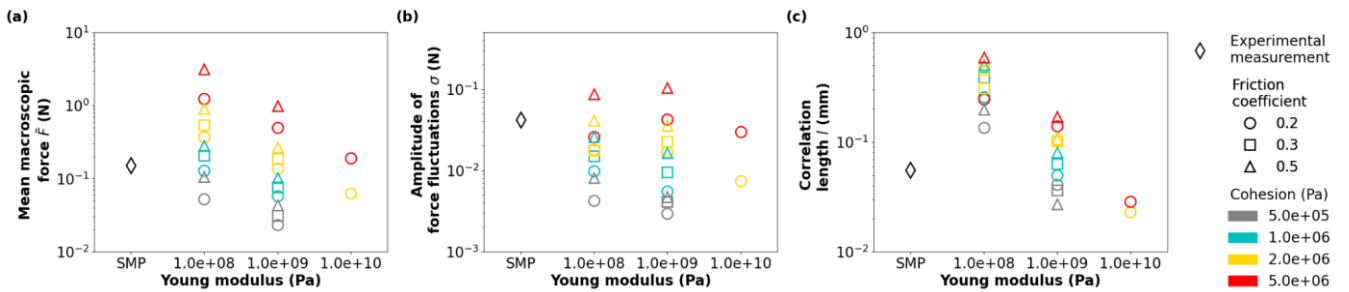

233

234 **Figure S19: Evolution of statistical indicators as a function of Young's modulus, cohesion and friction angle: (a) Mean macroscopic**  
 235 **force  $\bar{F}$ , (b) amplitude of force fluctuations  $\sigma$ , and (c) correlation length  $l$ . experimental results (black diamonds) have been added**  
 236 **to the plots. The results presented here correspond to the DH sample.**

237

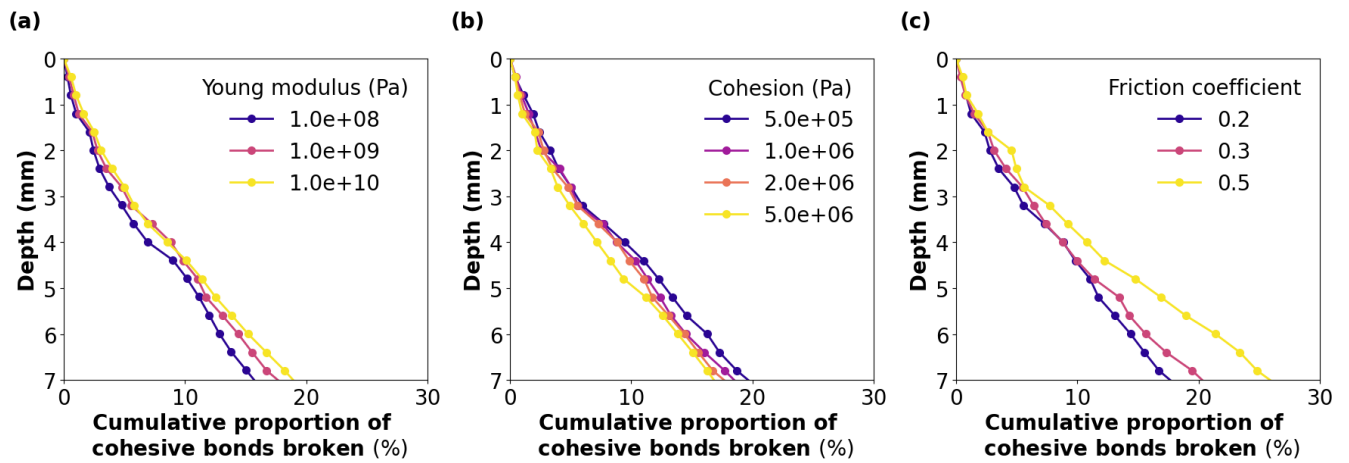

238  
 239 **Figure S20: Influence of mechanical parameters on the cumulative number of cohesive bonds as a function of tip penetration depth**  
 240 **obtained with DEM numerical simulations of CPT. The sensitivity analysis has been performed on (a) Young's modulus  $E$  (Pa) ( $C$**   
 241  **$= 2.0 \times 10^6$  Pa and  $\tan(\phi) = 0.2$ ), (b) the Cohesion  $C$  (Pa) ( $E = 1.0 \times 10^9$  Pa and  $\tan(\phi) = 0.2$ ) and (c) the Friction coefficient  $\tan(\phi)$  ( $E$**   
 242  **$= 1.0 \times 10^9$  Pa and  $C = 2.0 \times 10^6$  Pa).**

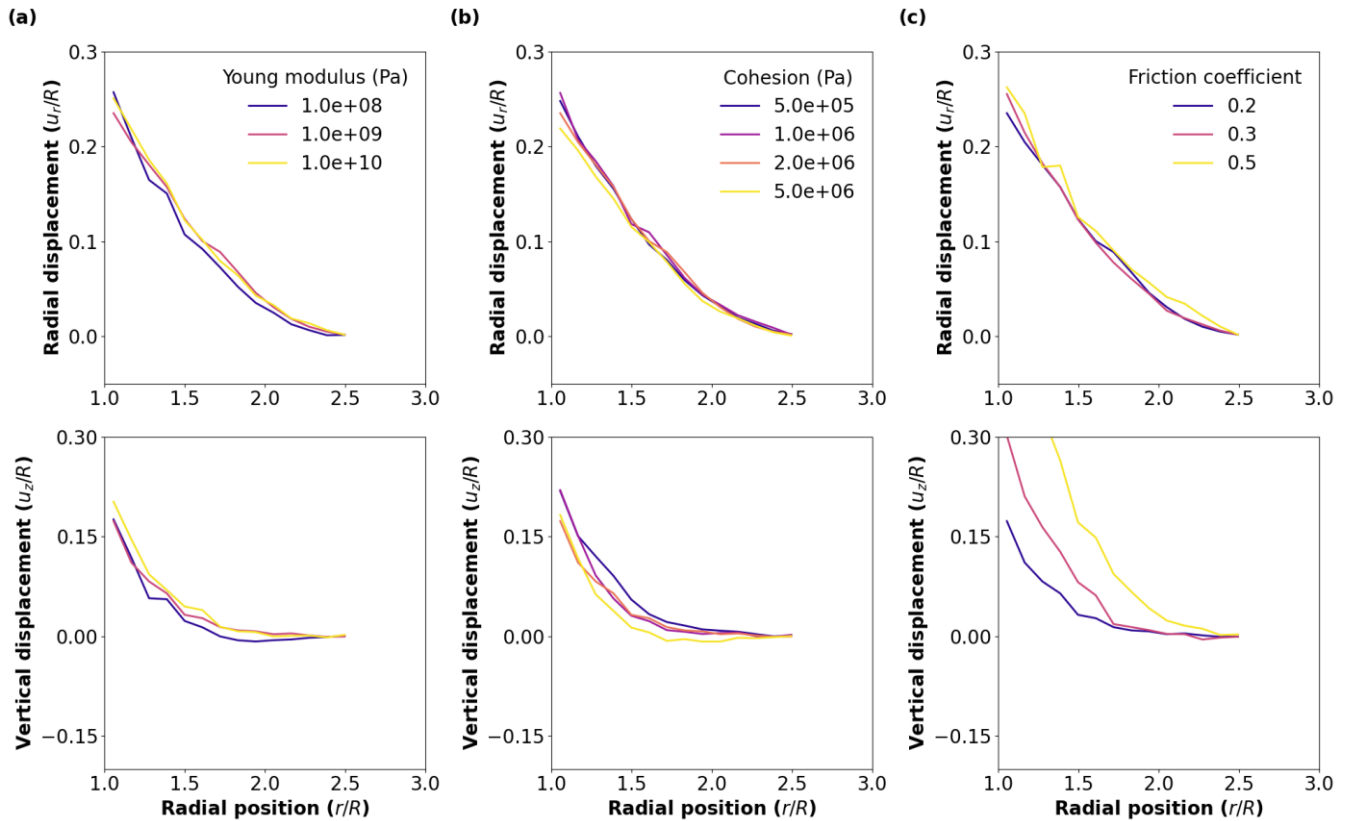

244  
 245 **Figure S21: Influence of mechanical parameters on the radial (top) and vertical (bottom) displacement profile**  
 246 **obtained with DEM numerical simulations of CPT. The sensitivity analysis has been performed on (a) Young's modulus  $E$  (Pa) ( $C = 2.0 \times 10^6$  Pa and**

247  $\tan(\varphi) = 0.2$ ), (b) the Cohesion  $C$  (Pa) ( $E = 1.0 \times 10^9$  Pa and  $\tan(\varphi) = 0.2$ ) and (c) the Friction coefficient  $\tan(\varphi)$  ( $E = 1.0 \times 10^9$  Pa and  
 248  $C = 2.0 \times 10^6$  Pa).

249

250 **S2.2.4 PP sample**

251

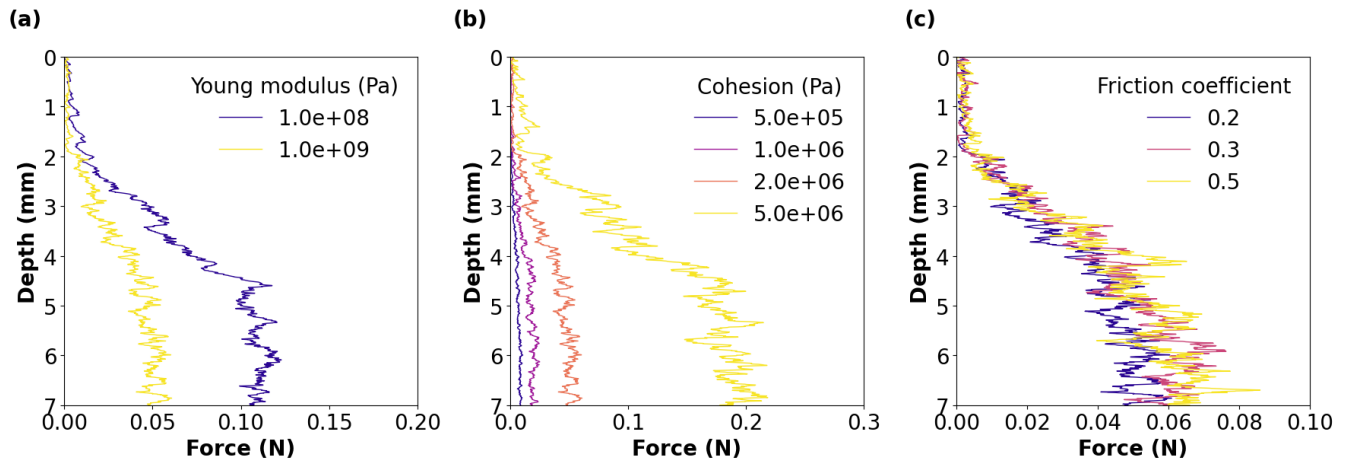

252 **Figure S22: Influence of mechanical parameters on the force profile obtained with DEM numerical simulations of CPT. The**  
 253 **sensitivity analysis has been performed on (a) Young's modulus  $E$  (Pa) ( $C = 1.0 \times 10^6$  Pa and  $\tan(\varphi) = 0.2$ ), (b) the Cohesion  $C$  (Pa)**  
 254 **( $E = 1.0 \times 10^8$  Pa and  $\tan(\varphi) = 0.2$ ) and (c) the Friction coefficient  $\tan(\varphi)$  ( $E = 1.0 \times 10^8$  Pa and  $C = 1.0 \times 10^6$  Pa).**  
 255

256

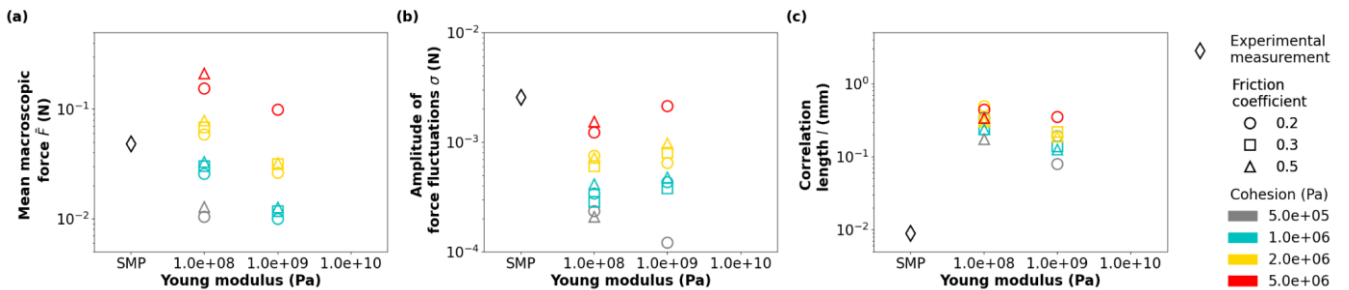

257 **Figure S23: Evolution of statistical indicators as a function of Young's modulus, cohesion and friction coefficient: (a) Mean**  
 258 **macroscopic force  $\bar{F}$ , (b) amplitude of force fluctuations  $\sigma$ , and (c) correlation length  $l$ . The experimental results (black diamonds)**  
 259 **have been added to the plots. The results presented here correspond to the PP sample.**  
 260

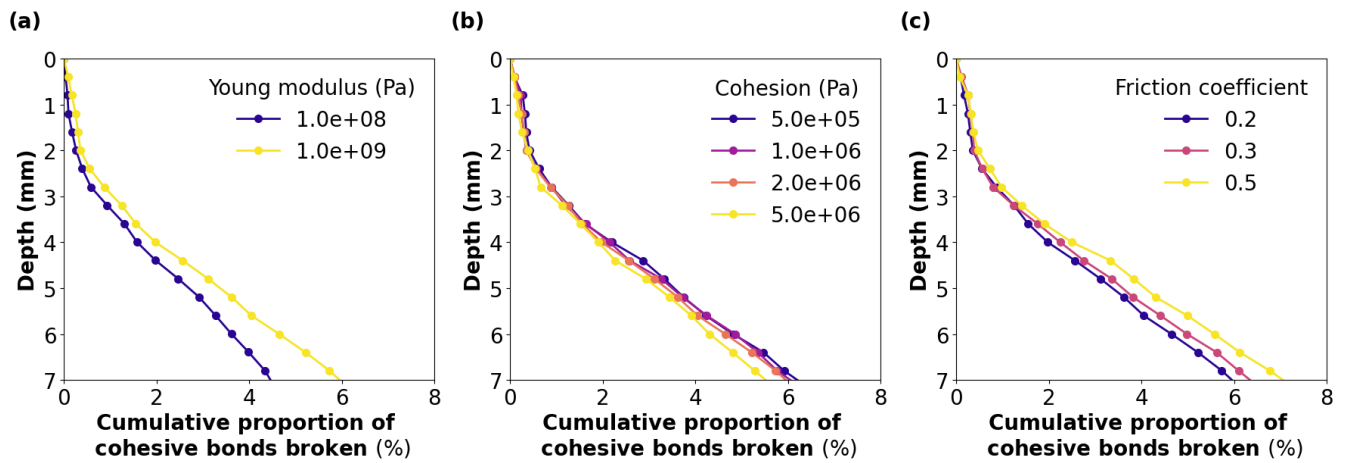

261  
262  
263  
264  
265

Figure S24: Influence of mechanical parameters on the cumulative number of cohesive bonds as a function of tip penetration depth obtained with DEM numerical simulations of CPT. The sensitivity analysis has been performed on (a) Young's modulus  $E$  (Pa) ( $C = 2.0 \times 10^6$  Pa and  $\tan(\varphi) = 0.2$ ), (b) the Cohesion  $C$  (Pa) ( $E = 1.0 \times 10^9$  Pa and  $\tan(\varphi) = 0.2$ ) and (c) the Friction coefficient  $\tan(\varphi)$  ( $E = 1.0 \times 10^9$  Pa and  $C = 2.0 \times 10^6$  Pa).

266

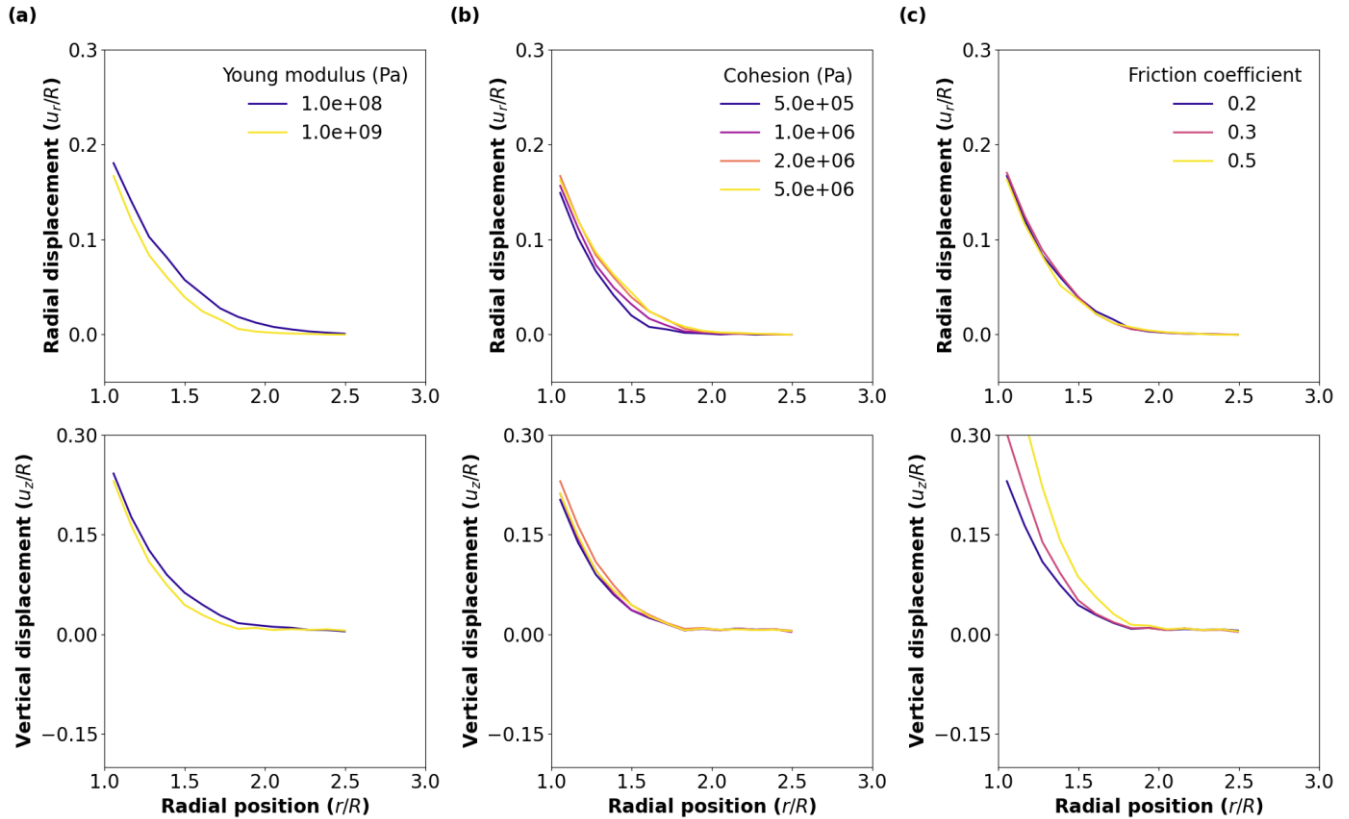

267  
268  
269

Figure S25: Influence of mechanical parameters on the vertical (top) and radial (bottom) displacement profile obtained with DEM numerical simulations of CPT. The sensitivity analysis has been performed on (a) Young's modulus  $E$  (Pa) ( $C = 2.0 \times 10^6$  Pa and

270  $\tan(\varphi) = 0.2$ ), (b) the Cohesion  $C$  (Pa) ( $E = 1.0 \times 10^9$  Pa and  $\tan(\varphi) = 0.2$ ) and (c) the Friction angle  $\tan(\varphi)$  ( $E = 1.0 \times 10^9$  Pa and  $C =$   
 271  $2.0 \times 10^6$  Pa).

272

273 **S2.3 Comparison of DEM model with experimental measurements**

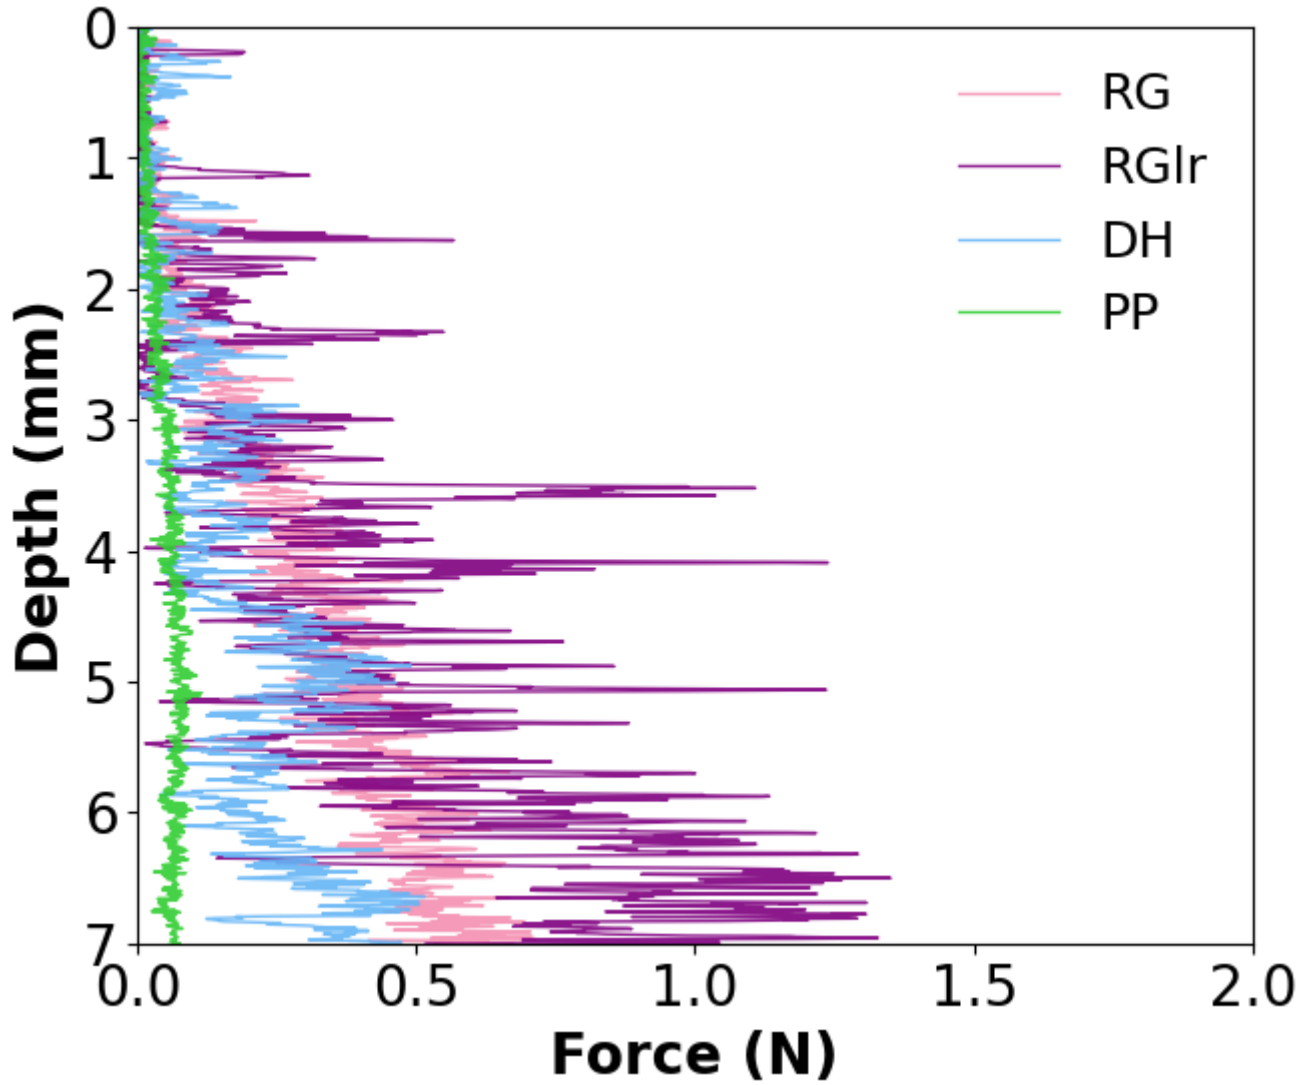

274

275 **Figure S26: Experimental force profiles obtained with SMP measurements on snow samples.**

276

| Sample | $\bar{F}$ (N)        | $\sigma$ (N)         | $l$ (mm)             |
|--------|----------------------|----------------------|----------------------|
| RG     | $2.5 \times 10^{-1}$ | $1.0 \times 10^{-2}$ | $1.8 \times 10^{-2}$ |

|             |                      |                      |                      |
|-------------|----------------------|----------------------|----------------------|
| <b>RGlr</b> | $3.3 \times 10^{-1}$ | $1.2 \times 10^{-1}$ | $6.3 \times 10^{-2}$ |
| <b>DH</b>   | $1.5 \times 10^{-1}$ | $4.2 \times 10^{-2}$ | $5.6 \times 10^{-2}$ |
| <b>PP</b>   | $4.8 \times 10^{-2}$ | $2.6 \times 10^{-3}$ | $9.0 \times 10^{-3}$ |

277 **Table S2: Statistical indicators (mean macroscopic force  $\bar{F}$ , amplitude of force fluctuations  $\sigma$ , correlation length  $l$ ) obtained for the**  
278 **experimental measurements.**

279

280

|                    | <b>E (Pa)</b>      | <b>C (Pa)</b>   | <b>tan(<math>\phi</math>)</b> | <b>RE<sub>F</sub></b> | <b>RE<sub><math>\sigma</math></sub></b> | <b>RE<sub>l</sub></b> | <b>RE<sub>tot</sub></b> |
|--------------------|--------------------|-----------------|-------------------------------|-----------------------|-----------------------------------------|-----------------------|-------------------------|
| <b>RG</b>          | $1 \times 10^8$    | $5 \times 10^5$ | 0.2                           | $-1.4 \times 10^{-1}$ | $-4.4 \times 10^{-1}$                   | $4.9 \times 10^{-1}$  | $2.1 \times 10^0$       |
|                    | $1 \times 10^8$    | $5 \times 10^5$ | 0.3                           | $-1.3 \times 10^0$    | $-3.8 \times 10^{-1}$                   | $5.2 \times 10^{-1}$  | $1.9 \times 10^0$       |
|                    | $1 \times 10^8$    | $5 \times 10^5$ | 0.5                           | $-1.2 \times 10^{-1}$ | $-3.0 \times 10^{-1}$                   | $5.0 \times 10^{-1}$  | $1.9 \times 10^0$       |
|                    | $1 \times 10^8$    | $1 \times 10^6$ | 0.2                           | $-7.1 \times 10^{-1}$ | $-3.0 \times 10^{-1}$                   | $6.1 \times 10^{-1}$  | $1.2 \times 10^0$       |
|                    | $1 \times 10^8$    | $1 \times 10^6$ | 0.3                           | $-5.8 \times 10^{-1}$ | $-2.2 \times 10^{-1}$                   | $5.7 \times 10^{-1}$  | $1.0 \times 10^0$       |
|                    | $1 \times 10^8$    | $1 \times 10^6$ | 0.5                           | $-4.6 \times 10^{-1}$ | $-1.6 \times 10^{-1}$                   | $5.9 \times 10^{-1}$  | $8.9 \times 10^{-1}$    |
|                    | $1 \times 10^8$    | $2 \times 10^6$ | 0.2                           | $6.9 \times 10^{-3}$  | $-1.1 \times 10^{-1}$                   | $7.2 \times 10^{-1}$  | $7.3 \times 10^{-1}$    |
|                    | $1 \times 10^8$    | $2 \times 10^6$ | 0.3                           | $1.6 \times 10^{-1}$  | $-5.9 \times 10^{-1}$                   | $7.7 \times 10^{-1}$  | $8.0 \times 10^{-1}$    |
|                    | $1 \times 10^8$    | $2 \times 10^6$ | 0.5                           | $2.5 \times 10^{-1}$  | $4.2 \times 10^{-2}$                    | $7.5 \times 10^{-1}$  | $8.3 \times 10^{-1}$    |
|                    | $1 \times 10^8$    | $5 \times 10^6$ | 0.2                           | $8.4 \times 10^{-1}$  | $3.9 \times 10^{-2}$                    | $7.6 \times 10^1$     | $1.4 \times 10^0$       |
|                    | $1 \times 10^8$    | $5 \times 10^6$ | 0.3                           | $9.9 \times 10^{-1}$  | $1.2 \times 10^{-1}$                    | $7.7 \times 10^1$     | $1.6 \times 10^0$       |
|                    | $1 \times 10^8$    | $5 \times 10^6$ | 0.5                           | $1.1 \times 10^0$     | $1.8 \times 10^{-1}$                    | $8.2 \times 10^{-1}$  | $1.8 \times 10^0$       |
|                    | $1 \times 10^9$    | $5 \times 10^5$ | 0.2                           | $-2.2 \times 10^0$    | $-4.9 \times 10^{-1}$                   | $1.6 \times 10^{-1}$  | $3.1 \times 10^0$       |
|                    | $1 \times 10^9$    | $5 \times 10^5$ | 0.3                           | $-2.0 \times 10^0$    | $-4.4 \times 10^{-1}$                   | $2.0 \times 10^{-1}$  | $2.9 \times 10^0$       |
|                    | $1 \times 10^9$    | $5 \times 10^5$ | 0.5                           | $-1.9 \times 10^0$    | $-3.9 \times 10^{-1}$                   | $1.7 \times 10^{-1}$  | $2.7 \times 10^0$       |
|                    | $1 \times 10^9$    | $1 \times 10^6$ | 0.2                           | $-1.5 \times 10^0$    | $-2.8 \times 10^{-1}$                   | $3.4 \times 10^{-1}$  | $2.1 \times 10^0$       |
|                    | $1 \times 10^9$    | $1 \times 10^6$ | 0.3                           | $-1.5 \times 10^0$    | $-2.5 \times 10^{-1}$                   | $2.8 \times 10^{-1}$  | $2.1 \times 10^0$       |
|                    | $1 \times 10^9$    | $1 \times 10^6$ | 0.5                           | $-1.3 \times 10^0$    | $-1.5 \times 10^{-1}$                   | $3.6 \times 10^{-1}$  | $1.9 \times 10^0$       |
|                    | $1 \times 10^9$    | $2 \times 10^6$ | 0.2                           | $-8.8 \times 10^{-1}$ | $-9.0 \times 10^{-2}$                   | $4.2 \times 10^{-1}$  | $1.3 \times 10^0$       |
|                    | $1 \times 10^9$    | $2 \times 10^6$ | 0.3                           | $-6.9 \times 10^{-1}$ | $2.8 \times 10^{-2}$                    | $5.5 \times 10^{-1}$  | $1.1 \times 10^0$       |
|                    | $1 \times 10^9$    | $2 \times 10^6$ | 0.5                           | $-6.4 \times 10^{-1}$ | $-2.9 \times 10^{-2}$                   | $3.7 \times 10^{-1}$  | $9.9 \times 10^{-1}$    |
|                    | $1 \times 10^9$    | $5 \times 10^6$ | 0.2                           | $1.2 \times 10^{-1}$  | $1.2 \times 10^{-1}$                    | $5.2 \times 10^{-1}$  | $5.6 \times 10^{-1}$    |
|                    | $1 \times 10^9$    | $5 \times 10^6$ | 0.3                           | $2.7 \times 10^{-1}$  | $1.6 \times 10^{-1}$                    | $5.0 \times 10^{-1}$  | $6.5 \times 10^{-1}$    |
|                    | $1 \times 10^9$    | $5 \times 10^6$ | 0.5                           | $3.6 \times 10^{-1}$  | $2.1 \times 10^{-1}$                    | $5.2 \times 10^{-1}$  | $7.6 \times 10^{-1}$    |
|                    | $1 \times 10^{10}$ | $5 \times 10^5$ | 0.2                           | $-3.0 \times 10^0$    | $-7.1 \times 10^{-1}$                   | $-2.6 \times 10^{-2}$ | $4.3 \times 10^0$       |
|                    | $1 \times 10^{10}$ | $1 \times 10^6$ | 0.2                           | $-2.2 \times 10^0$    | $-4.4 \times 10^{-1}$                   | $6.7 \times 10^{-3}$  | $3.1 \times 10^0$       |
|                    | $1 \times 10^{10}$ | $2 \times 10^6$ | 0.2                           | $-1.5 \times 10^0$    | $-1.6 \times 10^{-1}$                   | $1.4 \times 10^{-1}$  | $2.2 \times 10^0$       |
|                    | $1 \times 10^{10}$ | $2 \times 10^6$ | 0.5                           | $-1.3 \times 10^0$    | $-1.5 \times 10^{-1}$                   | $3.7 \times 10^{-2}$  | $1.8 \times 10^0$       |
| $1 \times 10^{10}$ | $5 \times 10^6$    | 0.2             | $-6.9 \times 10^{-1}$         | $1.3 \times 10^{-1}$  | $2.4 \times 10^{-1}$                    | $1.0 \times 10^0$     |                         |
| $1 \times 10^{10}$ | $5 \times 10^6$    | 0.5             | $-4.6 \times 10^{-1}$         | $2.2 \times 10^{-1}$  | $2.3 \times 10^{-1}$                    | $7.2 \times 10^{-1}$  |                         |
| <b>RGlr</b>        | $1 \times 10^8$    | $5 \times 10^5$ | 0.2                           | $-5.1 \times 10^{-1}$ | $-9.6 \times 10^{-1}$                   | $5.1 \times 10^{-1}$  | $1.3 \times 10^0$       |
|                    | $1 \times 10^8$    | $5 \times 10^5$ | 0.3                           | $-4.5 \times 10^{-2}$ | $-8.3 \times 10^{-1}$                   | $6.3 \times 10^{-1}$  | $1.0 \times 10^0$       |
|                    | $1 \times 10^8$    | $5 \times 10^5$ | 0.5                           | $5.3 \times 10^{-1}$  | $-5.2 \times 10^{-1}$                   | $8.0 \times 10^{-1}$  | $1.2 \times 10^0$       |
|                    | $1 \times 10^8$    | $1 \times 10^6$ | 0.2                           | $3.1 \times 10^{-1}$  | $-7.6 \times 10^{-1}$                   | $6.5 \times 10^{-1}$  | $1.1 \times 10^0$       |
|                    | $1 \times 10^8$    | $1 \times 10^6$ | 0.3                           | $8.8 \times 10^{-1}$  | $-4.8 \times 10^{-1}$                   | $5.2 \times 10^{-1}$  | $1.4 \times 10^0$       |



|           |                    |                 |     |                       |                       |                       |                      |
|-----------|--------------------|-----------------|-----|-----------------------|-----------------------|-----------------------|----------------------|
|           | $1 \times 10^8$    | $1 \times 10^6$ | 0.5 | $1.5 \times 10^0$     | $-4.1 \times 10^{-2}$ | $1.1 \times 10^0$     | $2.4 \times 10^0$    |
|           | $1 \times 10^8$    | $2 \times 10^6$ | 0.2 | $1.2 \times 10^0$     | $-3.9 \times 10^{-1}$ | $7.3 \times 10^{-1}$  | $1.9 \times 10^0$    |
|           | $1 \times 10^8$    | $2 \times 10^6$ | 0.3 | $1.7 \times 10^0$     | $-9.6 \times 10^{-2}$ | $8.9 \times 10^{-1}$  | $2.6 \times 10^0$    |
|           | $1 \times 10^8$    | $2 \times 10^6$ | 0.5 | $2.5 \times 10^0$     | $3.7 \times 10^{-1}$  | $8.4 \times 10^{-1}$  | $3.6 \times 10^0$    |
|           | $1 \times 10^8$    | $5 \times 10^6$ | 0.2 | $2.3 \times 10^0$     | $-8.1 \times 10^{-2}$ | $6.9 \times 10^{-1}$  | $3.3 \times 10^0$    |
|           | $1 \times 10^8$    | $5 \times 10^6$ | 0.3 | $2.8 \times 10^0$     | $1.6 \times 10^{-1}$  | $6.9 \times 10^{-1}$  | $4.0 \times 10^0$    |
|           | $1 \times 10^8$    | $5 \times 10^6$ | 0.5 | $3.5 \times 10^0$     | $3.8 \times 10^{-1}$  | $9.1 \times 10^{-1}$  | $5.0 \times 10^0$    |
|           | $1 \times 10^9$    | $5 \times 10^5$ | 0.2 | $-1.2 \times 10^0$    | $-1.0 \times 10^0$    | $-8.9 \times 10^{-2}$ | $2.0 \times 10^0$    |
|           | $1 \times 10^9$    | $5 \times 10^5$ | 0.3 | $-8.2 \times 10^{-1}$ | $-8.8 \times 10^{-1}$ | $-5.6 \times 10^{-2}$ | $1.5 \times 10^0$    |
|           | $1 \times 10^9$    | $5 \times 10^5$ | 0.5 | $-4.1 \times 10^{-1}$ | $-4.2 \times 10^{-1}$ | $1.3 \times 10^{-1}$  | $7.3 \times 10^{-1}$ |
|           | $1 \times 10^9$    | $1 \times 10^6$ | 0.2 | $-4.7 \times 10^{-1}$ | $-7.2 \times 10^{-1}$ | $1.9 \times 10^{-3}$  | $9.8 \times 10^{-1}$ |
|           | $1 \times 10^9$    | $1 \times 10^6$ | 0.3 | $5.5 \times 10^{-2}$  | $-4.6 \times 10^{-1}$ | $1.1 \times 10^{-1}$  | $4.8 \times 10^{-1}$ |
|           | $1 \times 10^9$    | $1 \times 10^6$ | 0.5 | $3.6 \times 10^{-1}$  | $-1.2 \times 10^{-1}$ | $2.2 \times 10^{-1}$  | $5.6 \times 10^{-1}$ |
|           | $1 \times 10^9$    | $2 \times 10^6$ | 0.2 | $3.9 \times 10^{-1}$  | $-2.8 \times 10^{-1}$ | $1.5 \times 10^{-1}$  | $6.3 \times 10^{-1}$ |
|           | $1 \times 10^9$    | $2 \times 10^6$ | 0.3 | $7.6 \times 10^{-1}$  | $-8.2 \times 10^{-2}$ | $2.3 \times 10^{-1}$  | $1.1 \times 10^0$    |
|           | $1 \times 10^9$    | $2 \times 10^6$ | 0.5 | $1.2 \times 10^0$     | $4.4 \times 10^{-1}$  | $3.1 \times 10^{-1}$  | $1.7 \times 10^0$    |
|           | $1 \times 10^9$    | $5 \times 10^6$ | 0.2 | $1.4 \times 10^0$     | $1.5 \times 10^{-1}$  | $2.7 \times 10^{-1}$  | $2.0 \times 10^0$    |
|           | $1 \times 10^9$    | $5 \times 10^6$ | 0.3 | $1.9 \times 10^0$     | $2.8 \times 10^{-1}$  | $3.8 \times 10^{-1}$  | $2.8 \times 10^0$    |
|           | $1 \times 10^9$    | $5 \times 10^6$ | 0.5 | $2.4 \times 10^0$     | $9.3 \times 10^{-1}$  | $7.6 \times 10^{-1}$  | $3.7 \times 10^0$    |
|           | $1 \times 10^{10}$ | $5 \times 10^5$ | 0.2 | $-2.2 \times 10^0$    | $-1.9 \times 10^0$    | $-3.6 \times 10^{-1}$ | $3.6 \times 10^0$    |
|           | $1 \times 10^{10}$ | $5 \times 10^5$ | 0.3 | $-1.6 \times 10^0$    | $-1.4 \times 10^0$    | $-2.8 \times 10^{-1}$ | $2.7 \times 10^0$    |
|           | $1 \times 10^{10}$ | $5 \times 10^5$ | 0.5 | $-1.1 \times 10^0$    | $-9.9 \times 10^{-1}$ | $-4.6 \times 10^{-1}$ | $1.9 \times 10^0$    |
|           | $1 \times 10^{10}$ | $1 \times 10^6$ | 0.2 | $-1.1 \times 10^0$    | $-1.0 \times 10^0$    | $-3.6 \times 10^{-1}$ | $1.9 \times 10^0$    |
|           | $1 \times 10^{10}$ | $1 \times 10^6$ | 0.3 | $-7.1 \times 10^{-1}$ | $-8.4 \times 10^{-1}$ | $-4.1 \times 10^{-1}$ | $1.4 \times 10^0$    |
|           | $1 \times 10^{10}$ | $1 \times 10^6$ | 0.5 | $-2.6 \times 10^{-1}$ | $-5.1 \times 10^{-1}$ | $-4.8 \times 10^{-1}$ | $7.9 \times 10^{-1}$ |
|           | $1 \times 10^{10}$ | $2 \times 10^6$ | 0.2 | $-2.6 \times 10^{-1}$ | $-4.2 \times 10^{-1}$ | $-4.0 \times 10^{-1}$ | $6.9 \times 10^{-1}$ |
|           | $1 \times 10^{10}$ | $2 \times 10^6$ | 0.3 | $1.5 \times 10^{-1}$  | $-2.5 \times 10^{-1}$ | $-4.5 \times 10^{-1}$ | $5.6 \times 10^{-1}$ |
|           | $1 \times 10^{10}$ | $2 \times 10^6$ | 0.5 | $5.3 \times 10^{-1}$  | $1.8 \times 10^{-1}$  | $-3.8 \times 10^{-1}$ | $8.6 \times 10^{-1}$ |
|           | $1 \times 10^{10}$ | $5 \times 10^6$ | 0.2 | $7.3 \times 10^{-1}$  | $1.2 \times 10^{-1}$  | $-3.4 \times 10^{-1}$ | $1.1 \times 10^0$    |
|           | $1 \times 10^{10}$ | $5 \times 10^6$ | 0.3 | $1.1 \times 10^0$     | $3.8 \times 10^{-1}$  | $-2.5 \times 10^{-1}$ | $1.6 \times 10^0$    |
|           | $1 \times 10^{10}$ | $5 \times 10^6$ | 0.5 | $1.4 \times 10^0$     | $6.8 \times 10^{-1}$  | $-2.5 \times 10^{-1}$ | $2.1 \times 10^0$    |
| <b>DH</b> | $1 \times 10^8$    | $5 \times 10^5$ | 0.2 | $-5.6 \times 10^{-1}$ | $-7.2 \times 10^{-1}$ | $3.1 \times 10^{-1}$  | $1.1 \times 10^0$    |
|           | $1 \times 10^8$    | $5 \times 10^5$ | 0.5 | $-1.9 \times 10^{-1}$ | $-5.2 \times 10^{-1}$ | $4.4 \times 10^{-1}$  | $7.3 \times 10^{-1}$ |
|           | $1 \times 10^8$    | $1 \times 10^6$ | 0.2 | $-8.6 \times 10^{-2}$ | $-4.6 \times 10^{-1}$ | $5.3 \times 10^{-1}$  | $7.1 \times 10^{-1}$ |
|           | $1 \times 10^8$    | $1 \times 10^6$ | 0.3 | $1.6 \times 10^{-1}$  | $-3.2 \times 10^{-1}$ | $6.7 \times 10^{-1}$  | $7.8 \times 10^{-1}$ |
|           | $1 \times 10^8$    | $1 \times 10^6$ | 0.5 | $3.3 \times 10^{-1}$  | $-1.5 \times 10^{-1}$ | $7.6 \times 10^{-1}$  | $9.1 \times 10^{-1}$ |
|           | $1 \times 10^8$    | $2 \times 10^6$ | 0.2 | $4.7 \times 10^{-1}$  | $-2.6 \times 10^{-1}$ | $7.5 \times 10^{-1}$  | $1.0 \times 10^0$    |
|           | $1 \times 10^8$    | $2 \times 10^6$ | 0.3 | $6.7 \times 10^{-1}$  | $-2.7 \times 10^{-1}$ | $5.9 \times 10^{-1}$  | $1.2 \times 10^0$    |
|           | $1 \times 10^8$    | $2 \times 10^6$ | 0.5 | $9.5 \times 10^{-1}$  | $-6.4 \times 10^{-3}$ | $7.3 \times 10^{-1}$  | $1.5 \times 10^0$    |
|           | $1 \times 10^8$    | $5 \times 10^6$ | 0.2 | $1.1 \times 10^0$     | $-1.5 \times 10^{-1}$ | $5.1 \times 10^{-1}$  | $1.7 \times 10^0$    |
|           | $1 \times 10^8$    | $5 \times 10^6$ | 0.5 | $1.6 \times 10^0$     | $2.3 \times 10^{-1}$  | $8.2 \times 10^{-1}$  | $2.4 \times 10^0$    |
|           | $1 \times 10^9$    | $5 \times 10^5$ | 0.2 | $-9.9 \times 10^{-1}$ | $-8.4 \times 10^{-1}$ | $-1.1 \times 10^{-1}$ | $1.6 \times 10^0$    |
|           | $1 \times 10^9$    | $5 \times 10^5$ | 0.3 | $-8.4 \times 10^{-1}$ | $-7.3 \times 10^{-1}$ | $-1.5 \times 10^{-1}$ | $1.4 \times 10^0$    |
|           | $1 \times 10^9$    | $5 \times 10^5$ | 0.5 | $-6.6 \times 10^{-1}$ | $-6.9 \times 10^{-1}$ | $-2.5 \times 10^{-1}$ | $1.2 \times 10^0$    |
|           | $1 \times 10^9$    | $1 \times 10^6$ | 0.2 | $-5.1 \times 10^{-1}$ | $-6.4 \times 10^{-1}$ | $-4.1 \times 10^{-2}$ | $9.6 \times 10^{-1}$ |
|           | $1 \times 10^9$    | $1 \times 10^6$ | 0.3 | $-3.6 \times 10^{-1}$ | $-4.7 \times 10^{-1}$ | $4.5 \times 10^{-2}$  | $7.0 \times 10^{-1}$ |

|    |                    |                 |     |                       |                       |                       |                      |
|----|--------------------|-----------------|-----|-----------------------|-----------------------|-----------------------|----------------------|
|    | $1 \times 10^9$    | $1 \times 10^6$ | 0.5 | $-2.0 \times 10^{-1}$ | $-3.0 \times 10^{-1}$ | $1.3 \times 10^{-1}$  | $4.3 \times 10^{-1}$ |
|    | $1 \times 10^9$    | $2 \times 10^6$ | 0.2 | $-5.4 \times 10^{-2}$ | $-2.9 \times 10^{-1}$ | $2.2 \times 10^{-1}$  | $3.7 \times 10^{-1}$ |
|    | $1 \times 10^9$    | $2 \times 10^6$ | 0.3 | $1.1 \times 10^{-1}$  | $-2.0 \times 10^{-1}$ | $2.1 \times 10^{-1}$  | $3.3 \times 10^{-1}$ |
|    | $1 \times 10^9$    | $2 \times 10^6$ | 0.5 | $3.0 \times 10^{-1}$  | $-5.2 \times 10^{-2}$ | $2.3 \times 10^{-1}$  | $4.8 \times 10^{-1}$ |
|    | $1 \times 10^9$    | $5 \times 10^6$ | 0.2 | $6.3 \times 10^{-1}$  | $5.1 \times 10^{-3}$  | $3.1 \times 10^{-1}$  | $9.5 \times 10^{-1}$ |
|    | $1 \times 10^9$    | $5 \times 10^6$ | 0.5 | $9.9 \times 10^{-1}$  | $2.9 \times 10^{-1}$  | $3.9 \times 10^{-1}$  | $1.5 \times 10^0$    |
|    | $1 \times 10^{10}$ | $2 \times 10^6$ | 0.2 | $-4.6 \times 10^{-1}$ | $-5.5 \times 10^{-1}$ | $-3.1 \times 10^{-1}$ | $9.1 \times 10^{-1}$ |
|    | $1 \times 10^{10}$ | $5 \times 10^6$ | 0.2 | $1.2 \times 10^{-1}$  | $-1.1 \times 10^{-1}$ | $-2.3 \times 10^{-1}$ | $3.1 \times 10^{-1}$ |
| PP | $1 \times 10^8$    | $5 \times 10^5$ | 0.2 | $-5.1 \times 10^{-1}$ | $-4.0 \times 10^{-1}$ | $7.7 \times 10^{-1}$  | $1.1 \times 10^0$    |
|    | $1 \times 10^8$    | $5 \times 10^5$ | 0.5 | $-4.4 \times 10^{-1}$ | $-4.2 \times 10^{-2}$ | $6.3 \times 10^{-1}$  | $9.8 \times 10^{-1}$ |
|    | $1 \times 10^8$    | $1 \times 10^6$ | 0.2 | $-2.1 \times 10^{-1}$ | $-3.4 \times 10^{-1}$ | $7.7 \times 10^{-1}$  | $8.9 \times 10^{-1}$ |
|    | $1 \times 10^8$    | $1 \times 10^6$ | 0.3 | $-1.5 \times 10^{-1}$ | $-3.7 \times 10^{-1}$ | $7.0 \times 10^{-1}$  | $8.2 \times 10^{-1}$ |
|    | $1 \times 10^8$    | $1 \times 10^6$ | 0.5 | $-1.2 \times 10^{-1}$ | $-3.1 \times 10^{-1}$ | $6.9 \times 10^{-1}$  | $7.8 \times 10^{-1}$ |
|    | $1 \times 10^8$    | $2 \times 10^6$ | 0.2 | $6.5 \times 10^{-2}$  | $-2.1 \times 10^{-1}$ | $8.5 \times 10^0$     | $8.8 \times 10^{-1}$ |
|    | $1 \times 10^8$    | $2 \times 10^6$ | 0.3 | $1.2 \times 10^{-1}$  | $-2.4 \times 10^{-1}$ | $7.6 \times 10^{-1}$  | $8.1 \times 10^{-1}$ |
|    | $1 \times 10^8$    | $2 \times 10^6$ | 0.5 | $1.6 \times 10^{-1}$  | $-2.1 \times 10^{-1}$ | $7.5 \times 10^{-1}$  | $8.1 \times 10^{-1}$ |
|    | $1 \times 10^8$    | $5 \times 10^6$ | 0.2 | $3.9 \times 10^{-1}$  | $-1.2 \times 10^{-1}$ | $8.3 \times 10^{-1}$  | $1.0 \times 10^0$    |
|    | $1 \times 10^8$    | $5 \times 10^6$ | 0.5 | $4.9 \times 10^{-1}$  | $-8.5 \times 10^{-2}$ | $7.7 \times 10^{-1}$  | $1.0 \times 10^0$    |
|    | $1 \times 10^9$    | $5 \times 10^5$ | 0.2 | $-8.2 \times 10^{-1}$ | $-5.1 \times 10^{-1}$ | $4.6 \times 10^{-1}$  | $1.3 \times 10^0$    |
|    | $1 \times 10^9$    | $1 \times 10^6$ | 0.2 | $-5.2 \times 10^{-1}$ | $-3.0 \times 10^{-1}$ | $6.5 \times 10^{-1}$  | $1.0 \times 10^0$    |
|    | $1 \times 10^9$    | $1 \times 10^6$ | 0.3 | $-4.6 \times 10^{-1}$ | $-3.2 \times 10^{-1}$ | $5.8 \times 10^{-1}$  | $9.3 \times 10^{-1}$ |
|    | $1 \times 10^9$    | $1 \times 10^6$ | 0.5 | $-4.4 \times 10^{-1}$ | $-2.8 \times 10^{-1}$ | $5.6 \times 10^{-1}$  | $8.8 \times 10^{-1}$ |
|    | $1 \times 10^9$    | $2 \times 10^6$ | 0.2 | $-2.0 \times 10^{-1}$ | $-2.3 \times 10^{-1}$ | $6.5 \times 10^{-1}$  | $7.4 \times 10^{-1}$ |
|    | $1 \times 10^9$    | $2 \times 10^6$ | 0.3 | $-1.4 \times 10^{-1}$ | $-2.0 \times 10^{-1}$ | $6.8 \times 10^{-1}$  | $7.3 \times 10^{-1}$ |
|    | $1 \times 10^9$    | $2 \times 10^6$ | 0.5 | $-1.3 \times 10^{-1}$ | $-1.6 \times 10^{-1}$ | $6.5 \times 10^{-1}$  | $6.9 \times 10^{-1}$ |
|    | $1 \times 10^9$    | $5 \times 10^6$ | 0.2 | $2.4 \times 10^{-1}$  | $-3.0 \times 10^{-2}$ | $7.8 \times 10^{-1}$  | $8.5 \times 10^{-1}$ |

**Table S3: Combinations of all the mechanical parameters (Young's modulus  $E$ , cohesion  $C$  and friction coefficient  $\tan(\varphi)$ ) tested for RG, RGl<sub>r</sub>, DH and PP samples. The errors on the statistical indicators (mean force  $\bar{F}$ , amplitude of force fluctuations  $\sigma$ , correlation length  $l$ ) were computed as the logarithmic relative error  $RE_k$  (Eq. 9) compared to the experimental values (Table S2). Negative error value indicates an underestimation and positive error value indicates an overestimation. The total error  $RE_{tot}$  is calculated with (Eq. 8) and the minimal value is used to select the best set of mechanical parameters for each sample.**

281

282

283

284

285

286

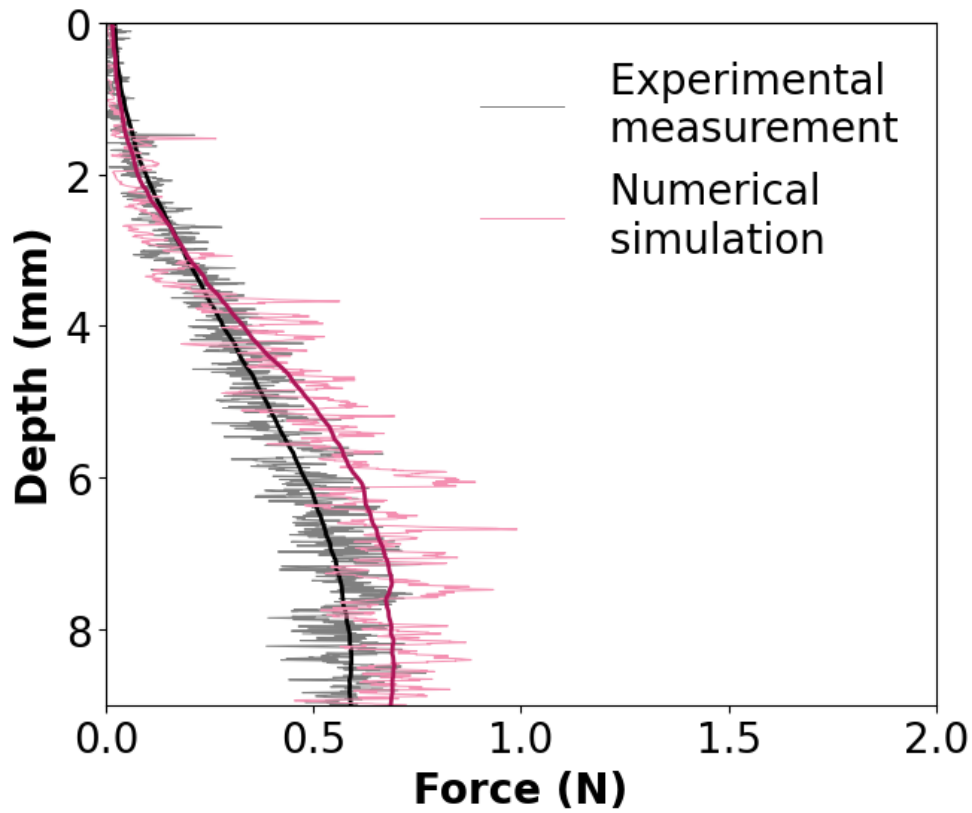

287  
288 **Figure S27: Experimental (grey) and numerical (coloured) force profiles obtained by CPT for RG sample. The numerical profiles**  
289 **correspond to the best fit of mechanical parameters (Table 3). The superposed smoothed profile (bold line) corresponds to the**  
290 **average force value over a rolling window of 3 mm.**

291

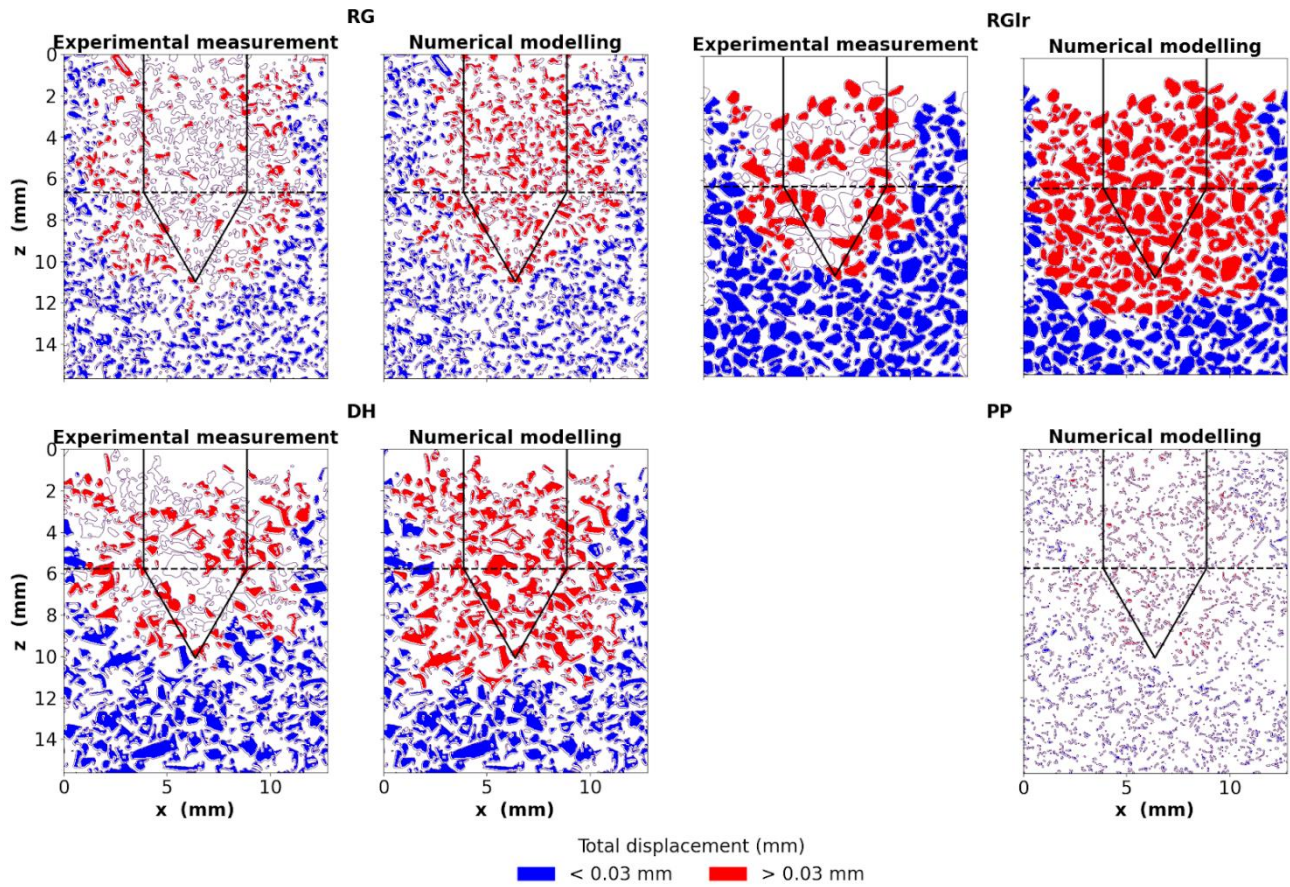

292  
293  
294  
295  
296  
297  
298

Figure S28: Total displacement maps obtained experimentally with  $\mu$ CT (left) and numerically with DEM simulation (right) for RG, RGlR, DH and PP samples. A displacement threshold of 0.03 mm has been set to define the deformation zone (Peinke et al. 2020). No coloured filled grains correspond to non-trackable grains in  $\mu$ CT scans (Peinke et al. 2020) and deleted grains in the DEM grain shape representation. The tip position is indicated with black solid lines. The horizontal black dashed line indicates the cone top. The displacement profiles are computed from the sample surface to the cone top. Results are obtained with the mechanical parameters  $E = 1 \times 10^9$  Pa,  $C = 2 \times 10^6$  Pa and  $\tan(\varphi) = 0.2$  (Table S3).

299

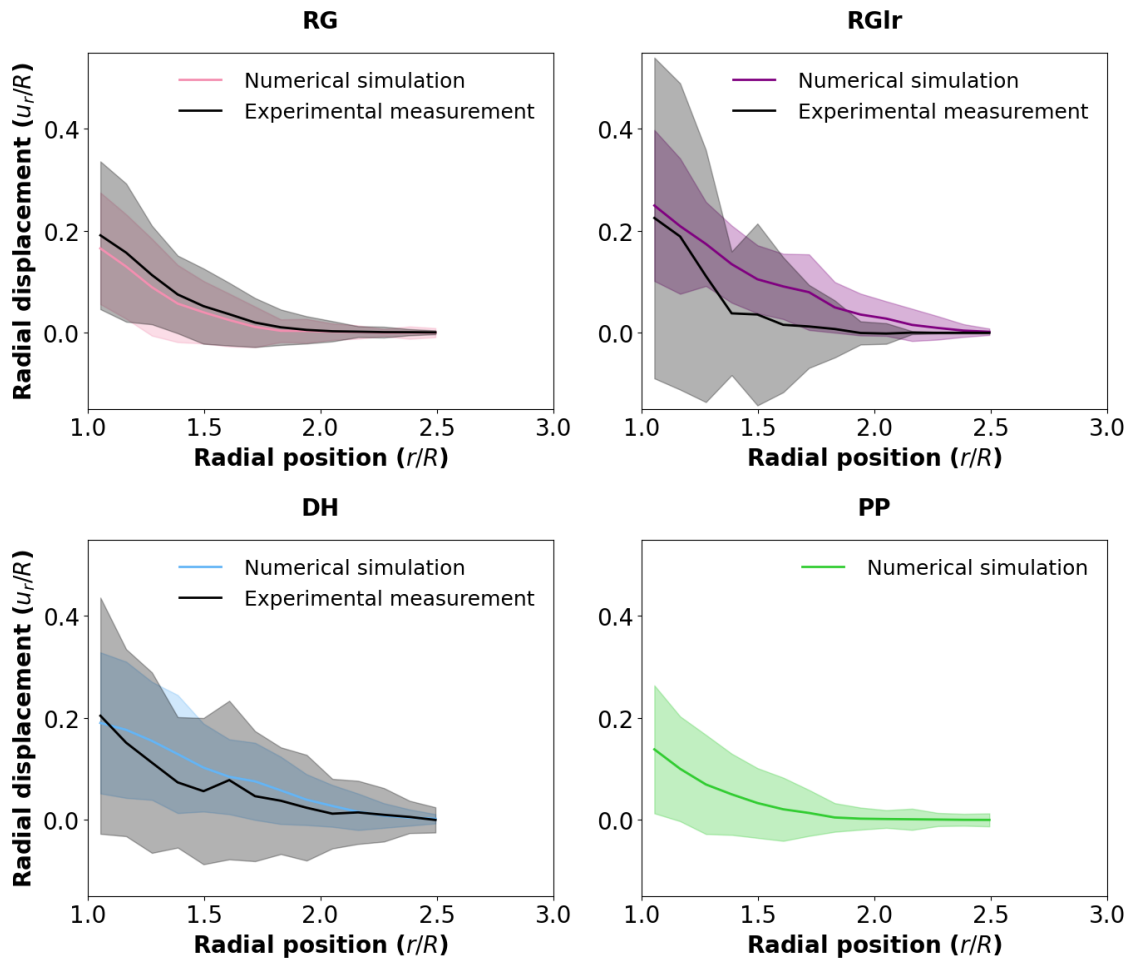

300

301 **Figure S29: Radial displacement profiles (solid lines) obtained experimentally (black) and numerically (coloured) for the RG, RGlR,**  
 302 **DH and PP samples. The shadowed areas around the solid lines correspond to the standard deviation of grain displacement**  
 303 **translating the variability of the radial displacement of grains. Results are obtained with the mechanical parameters  $E = 1 \times 10^9$  Pa,**  
 304  **$C = 2 \times 10^6$  Pa and  $\tan(\varphi) = 0.2$  (Table S3).**

305

306 **S3 Scaling law of the mean force**

307

| Sample | $\alpha$ | $\beta$ | $\bar{\lambda} (mm^{-1})$ |
|--------|----------|---------|---------------------------|
| RG     | -0.48    | 1.37    | 1.43                      |
| RGlR   | -0.43    | 1.29    | 4.88                      |
| DH     | -0.43    | 1.35    | 2.99                      |

|    |       |      |      |
|----|-------|------|------|
| PP | -0.36 | 1.27 | 0.87 |
|----|-------|------|------|

308 **Table S4:** Exponents  $\alpha$  and  $\beta$  are power law exponents obtained from the mean macroscopic force  $\bar{F}$  value dependence on the Young's  
309 modulus  $E$  and cohesion  $C$  respectively (Figs. 5 (a), S15 (a), S19 (a), S23 (a)). Exponents of each snow type are averaged values of  
310 exponents computed for fixed values of the mechanical parameters not involved in the power law.  $\bar{\lambda}$  corresponds to the slope of the  
311 proportion of cohesive bonds broken by depth unit ( $\text{mm}^{-1}$ ) (Figs. 2 (b), S6 (b), S8 (b), S10 (b)). The slope values obtained for the  
312 mechanical parameters  $E$  and  $C$  presented in Table S3 are averaged. All the results are provided for a friction coefficient  $\tan(\varphi)$  of  
313 **0.3.**
